# Supplementary material for: Cognitive Behavioral Therapy and Tai Chi Reverse Cellular and Genomic Markers of Inflammation in Late Life Insomnia: A Randomized Controlled Trial
Source: PubMed Central journal article supplement — Biol Psychiatry. Author manuscript; Available in PMC 2016 Nov 15. (PMC4524803; doi:10.1016/j.biopsych.2015.01.010), 2015-02-04
Supplement: NIHMS661445-supplement.pdf [file NIHMS661445-supplement.pdf]

**Cognitive Behavioral Therapy and Tai Chi Reverse Cellular and Genomic Markers  
of Inflammation in Late Life Insomnia: A Randomized Controlled Trial**

***Supplemental Information***

**Table of Contents:**

|                                                       |       |
|-------------------------------------------------------|-------|
| Description of Subjects                               | 2     |
| Description of Interventions                          | 3-6   |
| Figure S1. CONSORT Diagram                            | 7     |
| Table S1. Genes Differentially Expressed in CBT vs SS | 8-23  |
| Table S2. Genes Differentially Expressed in TCC vs SS | 24-31 |
| Exploratory Gene Set Enrichment Analysis              | 32    |
| CONSORT Checklist                                     | 33    |
| Supplemental References                               | 34-35 |

## **Description of Subjects**

Study participants, recruited by means of advertisements, were community-dwelling adults older than 55 years of age who fulfilled criteria for primary insomnia in *Diagnostic and Statistical Manual* (Fourth Edition, Text Revision [DSM-IV-TR]) (1) and for general insomnia in the *International Classification of Sleep Disorders* (Second Edition) (2). These criteria specify difficulty in initiating or maintaining sleep or non-restorative sleep for at least one month, along with significant distress and daytime impairment (3). DSM-5 revised the duration criteria from 1 to 3 months (4); we note that all participants also reported the presence of sleep difficulties  $\geq 3$  times per week for  $>3$  months.

DSM-IV-TR exclusion criteria of medical and psychiatric disorders were applied along with exclusion for routine use ( $>2$  times per week) of sedative hypnotic medications. Additional exclusion criteria were: 1) presence of another sleep disorder such as sleep apnea (apnea/hypopnea index  $>15$ ), restless legs, or periodic limb movements (movement index with arousal  $>15/h$ ) as determined by one night of polysomnography; 2) shift work, irregular sleep pattern, or delayed or advanced sleep phase as ascertained by daily diaries of sleep parameters for 2 weeks (i.e., Pittsburgh Sleep Diary); 3) regular ( $\geq 3$  x week) use of hypnotic medications or alcohol for sleep (patients using prescribed or over-the-counter sleep medications  $<3$  x week were enrolled after they withdrew from medications); 4) current diagnosis of major depression, unless treated and in remission; 5) cognitive impairment with score  $<23$  on Mini-Mental Status Examination (5); 6) abnormal screening laboratory tests (i.e., complete blood count, liver function tests, thyroid function); 7) tobacco smoking; 8) body mass index  $>35$  kg/m<sup>2</sup>; 9) debilitating condition that would impede full participation in the study; or 10) unavailability during the study period.

## **Description of Interventions**

The cognitive behavior therapy for sleep quality (CBT) was a multicomponent (i.e., behavioral, cognitive, educational) intervention as previously described by Morin *et al.* (6), with modification to teach behavioral strategies for management of daytime activity levels and enhancement of mood. CBT was administered in groups of 7-10 subjects by two co-therapists, a licensed clinical psychologist and a Ph.D. level psychologist, each with specialty training in behavioral medicine. Using a manualized approach, each session dictated objectives, patient skills, and treatment activities, in which therapists provided direct role-playing and other skill-development exercises designed to increase patients' self-efficacy in managing their insomnia. CBT included five treatment modules: 1) *Biopsychosocial Model and Insomnia* provided sleep education and discussion of the role of biological, psychological, social, and behavioral factors that affect sleep, such as stress, cognitive arousal, poor sleep hygiene, and mood disturbance. 2) *Cognitive Restructuring and Sleep Disturbance* used cognitive restructuring principles to help patients identify maladaptive sleep cognitions, neutralize their effect, and facilitate more adaptive thinking about sleep and its importance, including training in other cognitive coping strategies such as relaxing self-talk, imagery, and distraction methods (e.g., repetition of a calming phrase, thought). 3) *Stimulus Control* targeted sleep behavior directly by instructing patients to go to bed only when sleepy; use the bed only for sleep and sexual activity and not other behaviors that compete with sleep; leave the bedroom after being unable to fall asleep within 20 minutes; repeat this process as often as necessary either before falling asleep or after awakening from sleep; and establish and adhere to a fixed time of arising each morning. The sleep restriction component was not emphasized, as shortened sleep duration may confound measures of inflammation. For example, Vgontzas *et al.* found that insomnia with short sleep duration is associated with increases in inflammation (7,8). 4) *Mood Enhancement* assisted patients in developing behavioral goals in areas where sleep has disrupted their functioning and mood (e.g., work, social, physical activity), with the use of self-rewards (e.g., leisure, resting,

relaxation), scheduling of pleasant events and mental exercises to increase awareness of positive emotional states. Whereas incorporation of this mood module expanded, theoretically and pragmatically, the scope of traditional CBT for insomnia (6), this module was very compatible with the behavioral approach to insomnia as it was designed to promote understanding of the reciprocal relationship between sleep and mood, and how to implement strategies to improve mood either as a consequence of poor sleep or as a determinant of sleep disturbance. Additionally, incorporation of this module was done in an integrated manner throughout the protocol. 5) *Skill Consolidation and Adherence* was devoted to the development of individual treatment plans for follow-up, including performance of skills, and relapse prevention training methods (9) to help patients cope with situations that have contributed to poor sleep disturbance or that have interfered with the implementation of the insomnia management protocol.

Tai Chi Chih (TCC) is also a multicomponent intervention that integrates physical, psychosocial, emotion, spiritual, and behavioral elements to target arousal mechanisms that are thought to contribute to insomnia (10-12). Because of its mind-body and “meditation through movement” attributes, TCC was well-suited to help older adults cope with fatigue, perceived physical limitations, and negative emotional states, which are commonly associated with insomnia. In contrast with CBT, TCC did not address cognitive activity underlying appraisals of disordered sleep, but instead emphasized control over physical function and arousal-related responsiveness through the performance of repetitious, nonstrenuous, slow-paced movement. TCC was administered in groups of 7-10 subjects master's level instructor who had undergone certification by the national TCC association. Using a manualized approach (13), each session provided objectives and learning activities related to sequentially learning a specific set of 20 exercises with verification of skills attainment weekly. The first 8 weeks emphasized mastery of single forms through multiple repetitions in class and at home; latter weeks focused on class consolidation of daily practice routines with natural breathing integrated into all sessions. Diary

assessments were administered to assess frequency and duration of practice between sessions and at follow-up.

Sleep Seminar (SS) was an educational intervention that provided health information related to the physical, medical, and psychosocial factors that contribute to sleep problems in aging with an emphasis on sleep education and sleep hygiene practices. SS delivered some content (i.e., sleep hygiene principles) similar to that of CBT, but in contrast to CBT, SS simply provided educational information without discussion of how these practices might be used to change sleep-wake behaviors. Educational topics included during the 16 weeks were the following: 1) Sleep in late-life including discussion of changes in sleep with aging and misperceptions about sleep duration; 2) What is insomnia, including a review of the definition of insomnia, prevalence, discussion of potential causes of insomnia, and how the sleep diary can be used to evaluate insomnia; 3) Sleep basics including the sleep cycle and stages of sleep including the role of polysomnography in the evaluation of sleep; 4) Review of how sleep changes with age, and how these changes are different than insomnia with consideration of the association between sleep and medical comorbidities; 5) Other sleep disorders and sleep problems that are not insomnia, and how to assess whether they are present including sleep apnea, restless legs syndrome, and parasomnias; 6) Impact of insomnia on health including health functioning, accidents rates, and mood problems (session included discussion of the relationship between insomnia and inflammation and cardiovascular disease risk); 7) Traditional treatment for insomnia with review of medication, non-pharmacologic therapies, and role of sleep hygiene; 8) Sleep hygiene with focus on the use of alcohol, tobacco, certain non-prescription medications, and exercise; 9) Sleep hygiene II including review of age related sleep patterns, bedtime rituals, napping, and behaviors that are not compatible with good sleep such as TV watching in bed; 10) Sleep hygiene III with focus on sleep-wake principles such as the use of regular bedtime, and the impact of the environment such as light, temperature, and noise on sleep; 11) Managing daytime stress with review of certain stress management skills such as

progressive muscle relaxation (without instruction), time management, problem solving; 12) Managing daytime stress II with presentation of the impact of the stress on certain disease risk including associations between stress and insomnia, depression and cardiovascular disease; 13) Nutrition and health aging, and relation to sleep with review of the relationships between alcohol, caffeine use, and tobacco smoking and sleep; 14) Exercise and healthy aging with focus on the relationship between aerobic fitness and sleep; and the impact of exercise on sleep patterns as related to sleep hygiene practices; 15) How to get medical help including discussion of how to talk to your physician and access wellness educational resources; 16) Review of major topics discussed with directive question and answer session.

SS was administered in groups of 7-10 subjects as didactic presentations by physicians or licensed clinical psychologists as previously described (14), followed by group discussion and self-help quizzes to assess patient learning. SS served as a control for nonspecific treatment elements such as attention, expectation for improvement, and group support that pose rival explanations for the effectiveness of CBT and TCC. As in CBT and TCC, homework was prescribed to include reading of educational materials that expanded on session information.

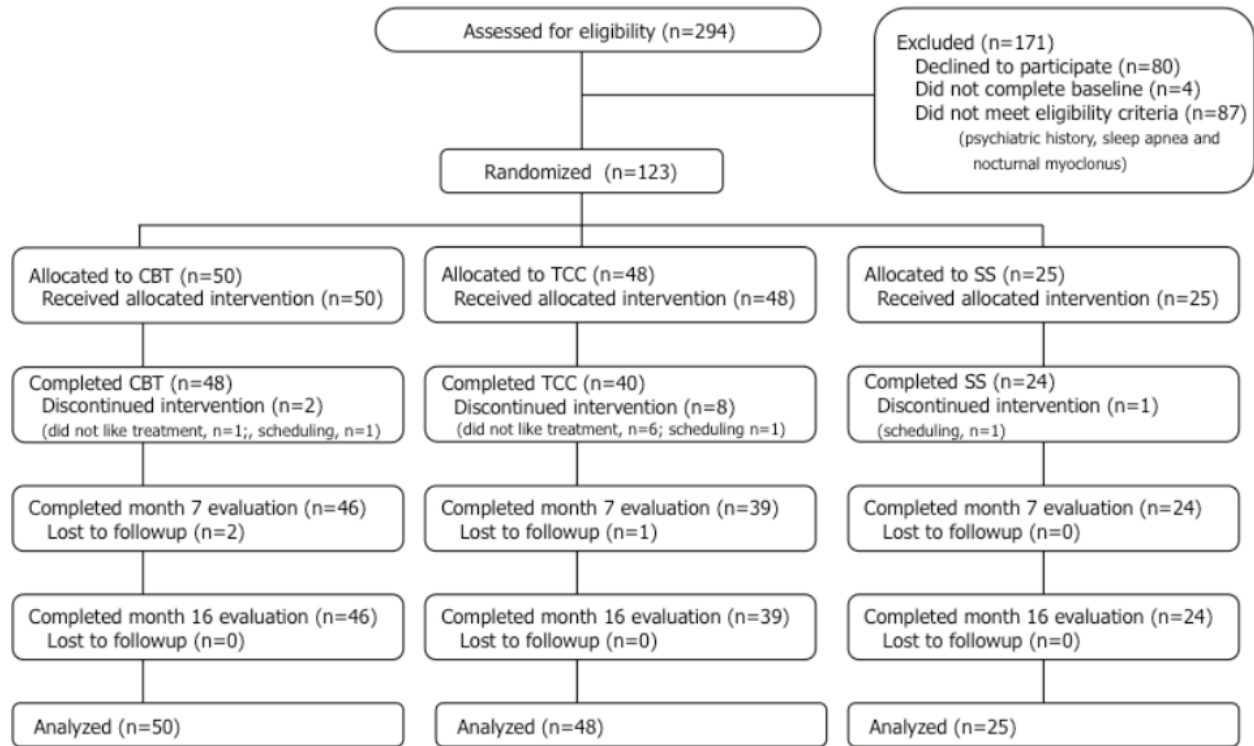

**Figure S1.** Screening, Randomization, and Completion of Post-Intervention, 7-Month, and 16-Month Evaluations.

**Table S1. Genes differentially expressed in CBT-I vs SS Control.**

| <b>Gene Symbol</b>  | <b>Mean SS</b> | <b>Mean CBT-I</b> | <b>Difference</b> | <b>Fold</b> |
|---------------------|----------------|-------------------|-------------------|-------------|
| <i>Up-regulated</i> |                |                   |                   |             |
| <i>PF4V1</i>        | 8.529          | 9.174             | 0.645             | 1.56        |
| <i>DEFA3</i>        | 9.875          | 10.466            | 0.591             | 1.51        |
| <i>DEFA1B</i>       | 9.670          | 10.260            | 0.589             | 1.51        |
| <i>IPO8</i>         | 8.167          | 8.751             | 0.583             | 1.50        |
| <i>LOC647450</i>    | 10.394         | 10.954            | 0.560             | 1.47        |
| <i>DEFA1</i>        | 10.671         | 11.228            | 0.557             | 1.47        |
| <i>FCRLA</i>        | 9.569          | 10.123            | 0.554             | 1.47        |
| <i>LOC649923</i>    | 8.071          | 8.620             | 0.549             | 1.46        |
| <i>LOC651751</i>    | 8.765          | 9.307             | 0.542             | 1.46        |
| <i>LOC647506</i>    | 9.761          | 10.300            | 0.539             | 1.45        |
| <i>MYOM2</i>        | 8.670          | 9.207             | 0.537             | 1.45        |
| <i>TCL1A</i>        | 8.161          | 8.692             | 0.532             | 1.45        |
| <i>VPREB3</i>       | 8.308          | 8.840             | 0.532             | 1.45        |
| <i>CD27</i>         | 9.875          | 10.401            | 0.526             | 1.44        |
| <i>GIMAP4</i>       | 11.660         | 12.186            | 0.526             | 1.44        |
| <i>LOC652493</i>    | 10.768         | 11.284            | 0.517             | 1.43        |
| <i>CNTNAP2</i>      | 7.680          | 8.191             | 0.511             | 1.43        |
| <i>SAMD9L</i>       | 9.073          | 9.582             | 0.508             | 1.42        |
| <i>LOC113386</i>    | 8.121          | 8.626             | 0.506             | 1.42        |
| <i>RBPM2</i>        | 8.176          | 8.681             | 0.505             | 1.42        |
| <i>HLA-DOB</i>      | 8.545          | 9.045             | 0.501             | 1.42        |
| <i>LOC653600</i>    | 8.258          | 8.758             | 0.501             | 1.42        |
| <i>LOC649210</i>    | 7.445          | 7.934             | 0.489             | 1.40        |
| <i>LOC650263</i>    | 7.803          | 8.279             | 0.476             | 1.39        |
| <i>GIMAP5</i>       | 10.208         | 10.682            | 0.474             | 1.39        |
| <i>LOC652694</i>    | 9.465          | 9.930             | 0.465             | 1.38        |
| <i>SUSD3</i>        | 9.232          | 9.691             | 0.459             | 1.37        |
| <i>LOC642113</i>    | 10.903         | 11.357            | 0.454             | 1.37        |
| <i>PRAGMIN</i>      | 8.850          | 9.304             | 0.454             | 1.37        |
| <i>IGJ</i>          | 10.128         | 10.573            | 0.446             | 1.36        |
| <i>CD24</i>         | 7.833          | 8.278             | 0.445             | 1.36        |



| <b>Gene Symbol</b>   | <b>Mean SS</b> | <b>Mean CBT-I</b> | <b>Difference</b> | <b>Fold</b> |
|----------------------|----------------|-------------------|-------------------|-------------|
| <i>ISG15</i>         | 10.055         | 10.491            | 0.436             | 1.35        |
| <i>IGLL1</i>         | 10.671         | 11.103            | 0.432             | 1.35        |
| <i>ELANE</i>         | 7.955          | 8.381             | 0.426             | 1.34        |
| <i>CD79B</i>         | 10.344         | 10.769            | 0.425             | 1.34        |
| <i>TNFSF10</i>       | 10.034         | 10.457            | 0.423             | 1.34        |
| <i>XAF1</i>          | 9.702          | 10.121            | 0.419             | 1.34        |
| <i>FAM113B</i>       | 10.889         | 11.306            | 0.416             | 1.33        |
| <i>PAQR8</i>         | 8.054          | 8.469             | 0.415             | 1.33        |
| <i>DCAF7</i>         | 9.437          | 9.851             | 0.413             | 1.33        |
| <i>CX3CR1</i>        | 10.346         | 10.758            | 0.412             | 1.33        |
| <i>SNORD13</i>       | 10.701         | 11.107            | 0.407             | 1.33        |
| <i>MIR1974</i>       | 12.316         | 12.721            | 0.404             | 1.32        |
| <i>MPL</i>           | 8.886          | 9.289             | 0.404             | 1.32        |
| <i>CAMP</i>          | 7.881          | 8.280             | 0.399             | 1.32        |
| <i>TREML1</i>        | 8.723          | 9.120             | 0.397             | 1.32        |
| <i>GAPT</i>          | 9.009          | 9.406             | 0.396             | 1.32        |
| <i>HLA-DQA1</i>      | 11.616         | 12.011            | 0.395             | 1.32        |
| <i>DKFZp761P0423</i> | 8.288          | 8.681             | 0.393             | 1.31        |
| <i>CTDSPL</i>        | 8.633          | 9.024             | 0.392             | 1.31        |
| <i>LOC253039</i>     | 7.966          | 8.357             | 0.392             | 1.31        |
| <i>LOC731682</i>     | 7.889          | 8.278             | 0.389             | 1.31        |
| <i>SNORA12</i>       | 10.026         | 10.412            | 0.386             | 1.31        |
| <i>OAS2</i>          | 9.211          | 9.591             | 0.381             | 1.30        |
| <i>GIMAP8</i>        | 9.851          | 10.231            | 0.380             | 1.30        |
| <i>MYL9</i>          | 7.906          | 8.281             | 0.375             | 1.30        |
| <i>C9orf69</i>       | 8.888          | 9.260             | 0.372             | 1.30        |
| <i>VPS35</i>         | 9.187          | 9.560             | 0.372             | 1.30        |
| <i>RBM14</i>         | 9.960          | 10.330            | 0.370             | 1.29        |
| <i>TRAF3IP3</i>      | 9.942          | 10.310            | 0.368             | 1.29        |
| <i>GIMAP7</i>        | 10.799         | 11.165            | 0.366             | 1.29        |
| <i>MNDA</i>          | 10.904         | 11.267            | 0.363             | 1.29        |
| <i>LOC100133678</i>  | 12.133         | 12.494            | 0.360             | 1.28        |
| <i>PVALB</i>         | 8.084          | 8.441             | 0.357             | 1.28        |
| <i>SLAMF6</i>        | 10.092         | 10.449            | 0.357             | 1.28        |

| <b>Gene Symbol</b> | <b>Mean SS</b> | <b>Mean CBT-I</b> | <b>Difference</b> | <b>Fold</b> |
|--------------------|----------------|-------------------|-------------------|-------------|
| <i>LDLRAP1</i>     | 8.413          | 8.767             | 0.355             | 1.28        |
| <i>DEFA4</i>       | 7.497          | 7.851             | 0.354             | 1.28        |
| <i>DENND2D</i>     | 9.472          | 9.824             | 0.351             | 1.28        |
| <i>LCN2</i>        | 9.497          | 9.848             | 0.351             | 1.28        |
| <i>FAIM3</i>       | 11.568         | 11.917            | 0.349             | 1.27        |
| <i>C2orf89</i>     | 9.440          | 9.789             | 0.349             | 1.27        |
| <i>HIST1H2AC</i>   | 10.268         | 10.617            | 0.348             | 1.27        |
| <i>SH3BGRL2</i>    | 9.799          | 10.146            | 0.347             | 1.27        |
| <i>SEPT5</i>       | 11.627         | 11.973            | 0.347             | 1.27        |
| <i>CLDN5</i>       | 8.222          | 8.569             | 0.347             | 1.27        |
| <i>OAS1</i>        | 8.570          | 8.916             | 0.346             | 1.27        |
| <i>METTL13</i>     | 8.007          | 8.352             | 0.345             | 1.27        |
| <i>KIAA0907</i>    | 8.880          | 9.224             | 0.345             | 1.27        |
| <i>GP9</i>         | 10.918         | 11.260            | 0.342             | 1.27        |
| <i>TCN1</i>        | 8.063          | 8.405             | 0.342             | 1.27        |
| <i>TMEM140</i>     | 9.013          | 9.355             | 0.342             | 1.27        |
| <i>GIMAP6</i>      | 9.258          | 9.596             | 0.337             | 1.26        |
| <i>LOC205251</i>   | 8.962          | 9.299             | 0.337             | 1.26        |
| <i>LPAR5</i>       | 8.315          | 8.651             | 0.336             | 1.26        |
| <i>STK38</i>       | 10.296         | 10.632            | 0.336             | 1.26        |
| <i>SPSB2</i>       | 7.812          | 8.148             | 0.336             | 1.26        |
| <i>C16orf30</i>    | 8.334          | 8.669             | 0.335             | 1.26        |
| <i>TSPAN9</i>      | 8.955          | 9.289             | 0.334             | 1.26        |
| <i>LRRN3</i>       | 8.084          | 8.418             | 0.334             | 1.26        |
| <i>APOBEC3G</i>    | 10.023         | 10.355            | 0.332             | 1.26        |
| <i>CD19</i>        | 9.090          | 9.421             | 0.332             | 1.26        |
| <i>LOC148413</i>   | 9.089          | 9.419             | 0.330             | 1.26        |
| <i>PLAC8</i>       | 11.641         | 11.971            | 0.330             | 1.26        |
| <i>PI16</i>        | 7.762          | 8.091             | 0.329             | 1.26        |
| <i>ST6GAL1</i>     | 9.523          | 9.852             | 0.329             | 1.26        |
| <i>MYC</i>         | 10.363         | 10.690            | 0.328             | 1.26        |
| <i>C6orf105</i>    | 8.235          | 8.561             | 0.326             | 1.25        |
| <i>EVL</i>         | 12.805         | 13.130            | 0.325             | 1.25        |
| <i>IFIT1</i>       | 8.037          | 8.363             | 0.325             | 1.25        |

| <b>Gene Symbol</b> | <b>Mean SS</b> | <b>Mean CBT-I</b> | <b>Difference</b> | <b>Fold</b> |
|--------------------|----------------|-------------------|-------------------|-------------|
| <i>KLRAQ1</i>      | 8.770          | 9.095             | 0.325             | 1.25        |
| <i>ITGA2B</i>      | 8.865          | 9.186             | 0.321             | 1.25        |
| <i>CCDC128</i>     | 8.603          | 8.921             | 0.319             | 1.25        |
| <i>ZNF512</i>      | 9.459          | 9.777             | 0.319             | 1.25        |
| <i>PARP4</i>       | 11.096         | 11.414            | 0.318             | 1.25        |
| <i>PARP1</i>       | 10.479         | 10.796            | 0.316             | 1.25        |
| <i>SELL</i>        | 11.783         | 12.100            | 0.316             | 1.25        |
| <i>IL8RBP</i>      | 8.412          | 8.728             | 0.316             | 1.25        |
| <i>MX1</i>         | 11.205         | 11.519            | 0.314             | 1.24        |
| <i>GSTM3</i>       | 7.601          | 7.914             | 0.313             | 1.24        |
| <i>GVIN1</i>       | 10.345         | 10.657            | 0.312             | 1.24        |
| <i>LACTB2</i>      | 8.124          | 8.436             | 0.312             | 1.24        |
| <i>M6PR</i>        | 10.527         | 10.838            | 0.310             | 1.24        |
| <i>C14orf173</i>   | 9.671          | 9.980             | 0.309             | 1.24        |
| <i>SLC40A1</i>     | 8.996          | 9.305             | 0.309             | 1.24        |
| <i>LOC650761</i>   | 7.660          | 7.968             | 0.309             | 1.24        |
| <i>EPSTI1</i>      | 9.645          | 9.954             | 0.309             | 1.24        |
| <i>ITM2C</i>       | 9.504          | 9.810             | 0.306             | 1.24        |
| <i>IFNAR1</i>      | 8.498          | 8.803             | 0.306             | 1.24        |
| <i>RNASE3</i>      | 7.345          | 7.650             | 0.305             | 1.24        |
| <i>LARP4B</i>      | 9.798          | 10.102            | 0.305             | 1.24        |
| <i>ESAM</i>        | 8.717          | 9.022             | 0.304             | 1.24        |
| <i>VSTM1</i>       | 8.161          | 8.465             | 0.304             | 1.23        |
| <i>ESYT1</i>       | 11.152         | 11.455            | 0.303             | 1.23        |
| <i>AARS</i>        | 9.927          | 10.228            | 0.301             | 1.23        |
| <i>GNG11</i>       | 11.998         | 12.299            | 0.301             | 1.23        |
| <i>NRGN</i>        | 12.158         | 12.456            | 0.299             | 1.23        |
| <i>C6orf125</i>    | 8.807          | 9.105             | 0.299             | 1.23        |
| <i>ICAM2</i>       | 10.970         | 11.269            | 0.299             | 1.23        |
| <i>TMEM204</i>     | 8.481          | 8.778             | 0.298             | 1.23        |
| <i>GBP4</i>        | 10.095         | 10.392            | 0.297             | 1.23        |
| <i>SIRPG</i>       | 7.979          | 8.276             | 0.297             | 1.23        |
| <i>LOC90925</i>    | 8.086          | 8.382             | 0.296             | 1.23        |
| <i>IFI44L</i>      | 9.009          | 9.304             | 0.295             | 1.23        |

| <b>Gene Symbol</b>  | <b>Mean SS</b> | <b>Mean CBT-I</b> | <b>Difference</b> | <b>Fold</b> |
|---------------------|----------------|-------------------|-------------------|-------------|
| <i>STMN3</i>        | 11.570         | 11.865            | 0.295             | 1.23        |
| <i>C8orf55</i>      | 9.078          | 9.371             | 0.293             | 1.23        |
| <i>TTC15</i>        | 9.282          | 9.574             | 0.293             | 1.23        |
| <i>C10orf6</i>      | 8.495          | 8.788             | 0.292             | 1.23        |
| <i>MFSD3</i>        | 8.264          | 8.556             | 0.292             | 1.22        |
| <i>TNNC2</i>        | 7.697          | 7.989             | 0.292             | 1.22        |
| <i>SDAD1</i>        | 10.290         | 10.581            | 0.291             | 1.22        |
| <i>LTF</i>          | 7.451          | 7.742             | 0.291             | 1.22        |
| <i>NQO2</i>         | 8.536          | 8.827             | 0.291             | 1.22        |
| <i>C11orf48</i>     | 9.107          | 9.395             | 0.288             | 1.22        |
| <i>HLA-DRB1</i>     | 9.240          | 9.528             | 0.288             | 1.22        |
| <i>NOSIP</i>        | 12.082         | 12.369            | 0.287             | 1.22        |
| <i>LPXN</i>         | 11.519         | 11.806            | 0.287             | 1.22        |
| <i>UBAP2L</i>       | 9.461          | 9.743             | 0.282             | 1.22        |
| <i>SERPINE2</i>     | 7.980          | 8.262             | 0.282             | 1.22        |
| <i>LOC100130633</i> | 8.541          | 8.822             | 0.281             | 1.22        |
| <i>DDX60</i>        | 8.496          | 8.777             | 0.281             | 1.22        |
| <i>ZFYVE26</i>      | 8.301          | 8.581             | 0.280             | 1.21        |
| <i>C1orf149</i>     | 7.702          | 7.981             | 0.279             | 1.21        |
| <i>GPBAR1</i>       | 9.674          | 9.953             | 0.279             | 1.21        |
| <i>TNFRSF17</i>     | 7.410          | 7.688             | 0.279             | 1.21        |
| <i>VWF</i>          | 8.105          | 8.384             | 0.279             | 1.21        |
| <i>MGC15763</i>     | 8.981          | 9.260             | 0.278             | 1.21        |
| <i>CTSG</i>         | 7.628          | 7.906             | 0.278             | 1.21        |
| <i>RPUSD3</i>       | 8.902          | 9.180             | 0.278             | 1.21        |
| <i>ACTN1</i>        | 10.086         | 10.364            | 0.278             | 1.21        |
| <i>COQ9</i>         | 8.803          | 9.080             | 0.277             | 1.21        |
| <i>CTTN</i>         | 8.431          | 8.708             | 0.277             | 1.21        |
| <i>PVRIG</i>        | 9.544          | 9.821             | 0.277             | 1.21        |
| <i>SLC35A5</i>      | 8.967          | 9.244             | 0.277             | 1.21        |
| <i>TNFAIP8L2</i>    | 7.405          | 7.681             | 0.276             | 1.21        |
| <i>C17orf62</i>     | 9.709          | 9.985             | 0.276             | 1.21        |
| <i>LOC652102</i>    | 7.524          | 7.800             | 0.276             | 1.21        |
| <i>PCMT1</i>        | 10.849         | 11.123            | 0.275             | 1.21        |

| <b>Gene Symbol</b>           | <b>Mean SS</b> | <b>Mean CBT-I</b> | <b>Difference</b> | <b>Fold</b> |
|------------------------------|----------------|-------------------|-------------------|-------------|
| <i>ALDH18A1</i>              | 8.146          | 8.420             | 0.274             | 1.21        |
| <i>CDK2AP2</i>               | 8.175          | 8.448             | 0.273             | 1.21        |
| <i>UFSP2</i>                 | 8.753          | 9.026             | 0.273             | 1.21        |
| <i>KIFC3</i>                 | 8.220          | 8.492             | 0.272             | 1.21        |
| <i>ALOX12</i>                | 8.296          | 8.566             | 0.271             | 1.21        |
| <i>MGC29506</i>              | 8.362          | 8.632             | 0.270             | 1.21        |
| <i>VCL</i>                   | 10.892         | 11.162            | 0.270             | 1.21        |
| <i>NDUFAF3</i>               | 10.144         | 10.413            | 0.269             | 1.21        |
| <i>LOC642755</i>             | 9.578          | 9.846             | 0.269             | 1.21        |
| <i>PDE3B</i>                 | 8.599          | 8.868             | 0.269             | 1.21        |
| <i>ZNF470</i>                | 7.365          | 7.633             | 0.268             | 1.20        |
| <i>CD1C</i>                  | 8.463          | 8.730             | 0.267             | 1.20        |
| <i>CNDP2</i>                 | 11.544         | 11.811            | 0.267             | 1.20        |
| <i>HCP5</i>                  | 10.682         | 10.948            | 0.266             | 1.20        |
| <i>PACSIN1</i>               | 7.647          | 7.912             | 0.266             | 1.20        |
| <i>UBASH3A</i>               | 8.105          | 8.370             | 0.265             | 1.20        |
| <i>TMEM71</i>                | 10.719         | 10.985            | 0.265             | 1.20        |
| <i>SNX27</i>                 | 10.471         | 10.737            | 0.265             | 1.20        |
| <i>METTL3</i>                | 8.615          | 8.880             | 0.265             | 1.20        |
| <i>LEF1</i>                  | 11.377         | 11.642            | 0.265             | 1.20        |
| <i>C14orf167</i>             | 8.298          | 8.562             | 0.264             | 1.20        |
| <i>NSMCE1</i>                | 9.921          | 10.184            | 0.264             | 1.20        |
| <i>ZW10</i>                  | 8.549          | 8.813             | 0.264             | 1.20        |
| <i>LAIR2</i>                 | 9.342          | 9.605             | 0.263             | 1.20        |
| <b><i>Down-regulated</i></b> |                |                   |                   |             |
| <i>HBEGF</i>                 | 11.022         | 9.992             | -1.031            | 0.49        |
| <i>RGS1</i>                  | 11.702         | 10.746            | -0.955            | 0.52        |
| <i>CXCL2</i>                 | 9.167          | 8.221             | -0.947            | 0.52        |
| <i>NR4A2</i>                 | 10.548         | 9.634             | -0.914            | 0.53        |
| <i>G0S2</i>                  | 10.470         | 9.617             | -0.853            | 0.55        |
| <i>LOC645979</i>             | 11.672         | 10.836            | -0.837            | 0.56        |
| <i>IL1B</i>                  | 11.241         | 10.421            | -0.820            | 0.57        |
| <i>IL8</i>                   | 13.429         | 12.628            | -0.802            | 0.57        |
| <i>LOC641768</i>             | 11.744         | 10.952            | -0.793            | 0.58        |

| <b>Gene Symbol</b>  | <b>Mean SS</b> | <b>Mean CBT-I</b> | <b>Difference</b> | <b>Fold</b> |
|---------------------|----------------|-------------------|-------------------|-------------|
| <i>LOC441377</i>    | 11.899         | 11.119            | -0.780            | 0.58        |
| <i>THBS1</i>        | 10.172         | 9.392             | -0.780            | 0.58        |
| <i>HLA-A29.1</i>    | 11.813         | 11.048            | -0.766            | 0.59        |
| <i>LOC728823</i>    | 11.601         | 10.898            | -0.703            | 0.61        |
| <i>GABARAPL1</i>    | 10.780         | 10.097            | -0.683            | 0.62        |
| <i>PTGS2</i>        | 10.942         | 10.267            | -0.675            | 0.63        |
| <i>CCL20</i>        | 7.942          | 7.276             | -0.665            | 0.63        |
| <i>PFKFB3</i>       | 11.050         | 10.412            | -0.638            | 0.64        |
| <i>RPS26P10</i>     | 9.254          | 8.631             | -0.623            | 0.65        |
| <i>OSM</i>          | 11.222         | 10.623            | -0.599            | 0.66        |
| <i>CXCL1</i>        | 8.202          | 7.607             | -0.595            | 0.66        |
| <i>LOC729009</i>    | 12.190         | 11.606            | -0.584            | 0.67        |
| <i>PTMA</i>         | 10.685         | 10.106            | -0.579            | 0.67        |
| <i>EAF1</i>         | 9.545          | 8.966             | -0.579            | 0.67        |
| <i>HIF1A</i>        | 8.878          | 8.308             | -0.570            | 0.67        |
| <i>NAMPT</i>        | 10.307         | 9.738             | -0.569            | 0.67        |
| <i>ACSL1</i>        | 9.802          | 9.240             | -0.562            | 0.68        |
| <i>LOC389293</i>    | 8.739          | 8.178             | -0.561            | 0.68        |
| <i>LOC100131971</i> | 9.555          | 9.000             | -0.554            | 0.68        |
| <i>CD83</i>         | 11.348         | 10.795            | -0.553            | 0.68        |
| <i>CCL3</i>         | 10.596         | 10.044            | -0.553            | 0.68        |
| <i>C17orf91</i>     | 9.853          | 9.307             | -0.546            | 0.69        |
| <i>AVPI1</i>        | 9.842          | 9.298             | -0.543            | 0.69        |
| <i>HECA</i>         | 10.084         | 9.545             | -0.539            | 0.69        |
| <i>HOXA5</i>        | 8.297          | 7.758             | -0.539            | 0.69        |
| <i>PLAUR</i>        | 10.178         | 9.641             | -0.537            | 0.69        |
| <i>SLC2A14</i>      | 8.442          | 7.907             | -0.535            | 0.69        |
| <i>SLC7A5</i>       | 9.757          | 9.226             | -0.531            | 0.69        |
| <i>SIK1</i>         | 9.231          | 8.703             | -0.527            | 0.69        |
| <i>ETS2</i>         | 9.809          | 9.291             | -0.518            | 0.70        |
| <i>MIR302C</i>      | 8.388          | 7.875             | -0.514            | 0.70        |
| <i>FOSB</i>         | 11.394         | 10.881            | -0.512            | 0.70        |
| <i>AXUD1</i>        | 12.164         | 11.672            | -0.492            | 0.71        |
| <i>LOC644928</i>    | 12.208         | 11.720            | -0.488            | 0.71        |

| <b>Gene Symbol</b>  | <b>Mean SS</b> | <b>Mean CBT-I</b> | <b>Difference</b> | <b>Fold</b> |
|---------------------|----------------|-------------------|-------------------|-------------|
| <i>MAP3K8</i>       | 9.947          | 9.460             | -0.487            | 0.71        |
| <i>EGR2</i>         | 10.079         | 9.595             | -0.484            | 0.72        |
| <i>SBDS</i>         | 10.304         | 9.825             | -0.480            | 0.72        |
| <i>PMAIP1</i>       | 8.954          | 8.475             | -0.479            | 0.72        |
| <i>LOC100129552</i> | 9.002          | 8.525             | -0.477            | 0.72        |
| <i>PHLDA1</i>       | 8.368          | 7.893             | -0.475            | 0.72        |
| <i>LOC649143</i>    | 10.894         | 10.422            | -0.473            | 0.72        |
| <i>CCRN4L</i>       | 8.334          | 7.865             | -0.470            | 0.72        |
| <i>LGALS3</i>       | 9.518          | 9.050             | -0.468            | 0.72        |
| <i>CA1</i>          | 8.394          | 7.928             | -0.465            | 0.72        |
| <i>LOC100133823</i> | 9.527          | 9.062             | -0.465            | 0.73        |
| <i>TNFAIP3</i>      | 12.339         | 11.875            | -0.465            | 0.73        |
| <i>SGK1</i>         | 12.373         | 11.910            | -0.462            | 0.73        |
| <i>TRIB1</i>        | 11.674         | 11.214            | -0.460            | 0.73        |
| <i>LOC650298</i>    | 9.615          | 9.166             | -0.450            | 0.73        |
| <i>LOC440063</i>    | 10.503         | 10.054            | -0.449            | 0.73        |
| <i>SERTAD1</i>      | 9.828          | 9.380             | -0.448            | 0.73        |
| <i>TNFRSF21</i>     | 8.959          | 8.511             | -0.448            | 0.73        |
| <i>ZBTB43</i>       | 9.409          | 8.962             | -0.448            | 0.73        |
| <i>CCL3L1</i>       | 9.798          | 9.351             | -0.447            | 0.73        |
| <i>RAP1GAP</i>      | 7.633          | 7.187             | -0.446            | 0.73        |
| <i>ATF3</i>         | 8.082          | 7.637             | -0.445            | 0.74        |
| <i>FTHL3</i>        | 11.252         | 10.818            | -0.433            | 0.74        |
| <i>LOC653778</i>    | 9.223          | 8.789             | -0.433            | 0.74        |
| <i>CD55</i>         | 9.661          | 9.227             | -0.433            | 0.74        |
| <i>GAPDHL6</i>      | 7.938          | 7.506             | -0.433            | 0.74        |
| <i>SGK</i>          | 12.835         | 12.404            | -0.431            | 0.74        |
| <i>LOC646753</i>    | 10.939         | 10.510            | -0.428            | 0.74        |
| <i>RIPK2</i>        | 11.292         | 10.865            | -0.428            | 0.74        |
| <i>HBG2</i>         | 10.548         | 10.121            | -0.427            | 0.74        |
| <i>IDI1</i>         | 9.416          | 8.990             | -0.425            | 0.75        |
| <i>C20orf108</i>    | 9.499          | 9.074             | -0.425            | 0.75        |
| <i>TP53INP2</i>     | 8.396          | 7.972             | -0.425            | 0.75        |
| <i>HBG1</i>         | 10.394         | 9.970             | -0.425            | 0.75        |

| <b>Gene Symbol</b>  | <b>Mean SS</b> | <b>Mean CBT-I</b> | <b>Difference</b> | <b>Fold</b> |
|---------------------|----------------|-------------------|-------------------|-------------|
| <i>SLC25A24</i>     | 8.684          | 8.260             | -0.424            | 0.75        |
| <i>FTHL8</i>        | 12.162         | 11.741            | -0.421            | 0.75        |
| <i>FAM46C</i>       | 11.589         | 11.172            | -0.418            | 0.75        |
| <i>PDE4B</i>        | 9.446          | 9.029             | -0.417            | 0.75        |
| <i>RAB20</i>        | 8.524          | 8.108             | -0.416            | 0.75        |
| <i>LOC644934</i>    | 12.295         | 11.880            | -0.416            | 0.75        |
| <i>REL</i>          | 8.390          | 7.975             | -0.415            | 0.75        |
| <i>DUSP2</i>        | 11.194         | 10.780            | -0.414            | 0.75        |
| <i>DDIT3</i>        | 9.218          | 8.804             | -0.414            | 0.75        |
| <i>CYP4B1</i>       | 7.754          | 7.342             | -0.412            | 0.75        |
| <i>NFIL3</i>        | 10.949         | 10.539            | -0.409            | 0.75        |
| <i>MAFB</i>         | 12.073         | 11.665            | -0.409            | 0.75        |
| <i>IER3</i>         | 11.169         | 10.765            | -0.404            | 0.76        |
| <i>SESN3</i>        | 8.136          | 7.736             | -0.400            | 0.76        |
| <i>ARL4A</i>        | 8.252          | 7.855             | -0.397            | 0.76        |
| <i>LOC100129650</i> | 11.610         | 11.213            | -0.397            | 0.76        |
| <i>MIR130A</i>      | 7.900          | 7.504             | -0.396            | 0.76        |
| <i>C18orf32</i>     | 8.442          | 8.046             | -0.396            | 0.76        |
| <i>RASD1</i>        | 8.600          | 8.206             | -0.395            | 0.76        |
| <i>ETV3</i>         | 8.351          | 7.959             | -0.392            | 0.76        |
| <i>NRIP3</i>        | 8.367          | 7.975             | -0.392            | 0.76        |
| <i>FAM21D</i>       | 8.127          | 7.739             | -0.388            | 0.76        |
| <i>LOC643287</i>    | 10.536         | 10.148            | -0.387            | 0.77        |
| <i>LOC727908</i>    | 9.089          | 8.702             | -0.387            | 0.77        |
| <i>IRS2</i>         | 10.887         | 10.501            | -0.386            | 0.77        |
| <i>CHPT1</i>        | 10.275         | 9.891             | -0.385            | 0.77        |
| <i>FECH</i>         | 8.153          | 7.770             | -0.383            | 0.77        |
| <i>LOC642828</i>    | 11.525         | 11.144            | -0.381            | 0.77        |
| <i>NAT13</i>        | 8.523          | 8.145             | -0.379            | 0.77        |
| <i>RPS26L</i>       | 13.232         | 12.854            | -0.378            | 0.77        |
| <i>LOC391045</i>    | 8.487          | 8.110             | -0.377            | 0.77        |
| <i>NLRP3</i>        | 10.845         | 10.468            | -0.377            | 0.77        |
| <i>CYTIP</i>        | 8.408          | 8.031             | -0.377            | 0.77        |
| <i>CHD1</i>         | 10.143         | 9.768             | -0.375            | 0.77        |



| <b>Gene Symbol</b>  | <b>Mean SS</b> | <b>Mean CBT-I</b> | <b>Difference</b> | <b>Fold</b> |
|---------------------|----------------|-------------------|-------------------|-------------|
| <i>SAMSN1</i>       | 9.387          | 9.013             | -0.373            | 0.77        |
| <i>IFIT1L</i>       | 7.754          | 7.383             | -0.371            | 0.77        |
| <i>CLEC7A</i>       | 8.981          | 8.611             | -0.370            | 0.77        |
| <i>RPS26</i>        | 11.247         | 10.877            | -0.370            | 0.77        |
| <i>KIR3DL2</i>      | 8.799          | 8.429             | -0.369            | 0.77        |
| <i>TMEM176A</i>     | 9.106          | 8.737             | -0.369            | 0.77        |
| <i>EMP1</i>         | 8.936          | 8.569             | -0.368            | 0.78        |
| <i>PPP1R15A</i>     | 12.276         | 11.909            | -0.367            | 0.78        |
| <i>MEX3C</i>        | 9.832          | 9.466             | -0.367            | 0.78        |
| <i>RNF138</i>       | 9.801          | 9.435             | -0.367            | 0.78        |
| <i>KRT1</i>         | 7.567          | 7.202             | -0.365            | 0.78        |
| <i>CLK1</i>         | 10.422         | 10.060            | -0.361            | 0.78        |
| <i>SPRY2</i>        | 7.972          | 7.611             | -0.361            | 0.78        |
| <i>YOD1</i>         | 8.842          | 8.481             | -0.361            | 0.78        |
| <i>EBI2</i>         | 11.894         | 11.534            | -0.361            | 0.78        |
| <i>GPR183</i>       | 8.062          | 7.702             | -0.360            | 0.78        |
| <i>ISCA1</i>        | 9.391          | 9.032             | -0.359            | 0.78        |
| <i>EAPP</i>         | 10.087         | 9.728             | -0.358            | 0.78        |
| <i>RAPGEF2</i>      | 8.935          | 8.578             | -0.357            | 0.78        |
| <i>LOC100008589</i> | 8.690          | 8.334             | -0.357            | 0.78        |
| <i>PTS</i>          | 9.737          | 9.380             | -0.357            | 0.78        |
| <i>FOSL2</i>        | 8.645          | 8.289             | -0.356            | 0.78        |
| <i>FTHL12</i>       | 13.391         | 13.036            | -0.355            | 0.78        |
| <i>SIRT1</i>        | 9.165          | 8.812             | -0.353            | 0.78        |
| <i>LOC100132863</i> | 10.289         | 9.936             | -0.353            | 0.78        |
| <i>C5AR1</i>        | 11.206         | 10.855            | -0.351            | 0.78        |
| <i>MAFF</i>         | 7.980          | 7.629             | -0.351            | 0.78        |
| <i>PSCDBP</i>       | 10.476         | 10.125            | -0.351            | 0.78        |
| <i>PRPF18</i>       | 8.577          | 8.226             | -0.351            | 0.78        |
| <i>C3AR1</i>        | 8.821          | 8.472             | -0.350            | 0.79        |
| <i>CCDC49</i>       | 9.172          | 8.823             | -0.349            | 0.79        |
| <i>MTMR6</i>        | 9.167          | 8.817             | -0.349            | 0.79        |
| <i>OTUD1</i>        | 9.382          | 9.033             | -0.349            | 0.79        |
| <i>CENTG2</i>       | 8.565          | 8.217             | -0.349            | 0.79        |

| <b>Gene Symbol</b>  | <b>Mean SS</b> | <b>Mean CBT-I</b> | <b>Difference</b> | <b>Fold</b> |
|---------------------|----------------|-------------------|-------------------|-------------|
| <i>CCNH</i>         | 8.785          | 8.437             | -0.348            | 0.79        |
| <i>CCL3L3</i>       | 11.219         | 10.872            | -0.347            | 0.79        |
| <i>FAM116A</i>      | 10.196         | 9.849             | -0.347            | 0.79        |
| <i>SLC4A1</i>       | 7.936          | 7.590             | -0.347            | 0.79        |
| <i>CXCL16</i>       | 10.383         | 10.038            | -0.346            | 0.79        |
| <i>PDE4D</i>        | 8.472          | 8.127             | -0.345            | 0.79        |
| <i>MAPK6</i>        | 9.745          | 9.401             | -0.344            | 0.79        |
| <i>SNIP1</i>        | 9.874          | 9.530             | -0.344            | 0.79        |
| <i>TWISTNB</i>      | 8.167          | 7.824             | -0.342            | 0.79        |
| <i>CLEC11A</i>      | 8.302          | 7.960             | -0.342            | 0.79        |
| <i>SNORD3D</i>      | 9.898          | 9.556             | -0.342            | 0.79        |
| <i>MICALCL</i>      | 7.915          | 7.573             | -0.342            | 0.79        |
| <i>SKP1</i>         | 10.383         | 10.042            | -0.341            | 0.79        |
| <i>PNO1</i>         | 8.565          | 8.225             | -0.340            | 0.79        |
| <i>ANKDD1A</i>      | 8.350          | 8.010             | -0.340            | 0.79        |
| <i>LOC440280</i>    | 9.832          | 9.492             | -0.340            | 0.79        |
| <i>PTGES3</i>       | 10.233         | 9.893             | -0.339            | 0.79        |
| <i>JMJD1A</i>       | 9.424          | 9.085             | -0.339            | 0.79        |
| <i>HLA-C</i>        | 10.041         | 9.704             | -0.338            | 0.79        |
| <i>HMGB1</i>        | 9.005          | 8.668             | -0.338            | 0.79        |
| <i>ISCA1L</i>       | 8.742          | 8.405             | -0.337            | 0.79        |
| <i>LOC100129657</i> | 10.552         | 10.216            | -0.337            | 0.79        |
| <i>dJ341D10.1</i>   | 9.242          | 8.907             | -0.335            | 0.79        |
| <i>HEBP2</i>        | 11.292         | 10.958            | -0.334            | 0.79        |
| <i>LOC650646</i>    | 13.913         | 13.580            | -0.334            | 0.79        |
| <i>FTHL11</i>       | 12.323         | 11.989            | -0.333            | 0.79        |
| <i>GRASP</i>        | 8.516          | 8.183             | -0.333            | 0.79        |
| <i>LOC654103</i>    | 9.904          | 9.571             | -0.333            | 0.79        |
| <i>SLC2A3</i>       | 13.384         | 13.053            | -0.331            | 0.80        |
| <i>DNAJB9</i>       | 10.155         | 9.824             | -0.331            | 0.80        |
| <i>FTHL2</i>        | 11.917         | 11.587            | -0.330            | 0.80        |
| <i>NEU4</i>         | 7.285          | 6.956             | -0.329            | 0.80        |
| <i>MXD1</i>         | 10.432         | 10.103            | -0.328            | 0.80        |
| <i>EGR1</i>         | 11.860         | 11.532            | -0.328            | 0.80        |

| <b>Gene Symbol</b>  | <b>Mean SS</b> | <b>Mean CBT-I</b> | <b>Difference</b> | <b>Fold</b> |
|---------------------|----------------|-------------------|-------------------|-------------|
| <i>EIF1B</i>        | 11.323         | 10.995            | -0.328            | 0.80        |
| <i>PYROXD1</i>      | 7.997          | 7.669             | -0.328            | 0.80        |
| <i>TLR1</i>         | 8.381          | 8.054             | -0.327            | 0.80        |
| <i>THBD</i>         | 7.891          | 7.565             | -0.326            | 0.80        |
| <i>ZFP36L1</i>      | 10.857         | 10.530            | -0.326            | 0.80        |
| <i>MGC61598</i>     | 8.655          | 8.330             | -0.325            | 0.80        |
| <i>KBTD8</i>        | 8.730          | 8.406             | -0.325            | 0.80        |
| <i>SLC16A6</i>      | 8.759          | 8.438             | -0.322            | 0.80        |
| <i>FTH1</i>         | 11.495         | 11.174            | -0.321            | 0.80        |
| <i>LOC728732</i>    | 10.309         | 9.988             | -0.321            | 0.80        |
| <i>TXNL1</i>        | 8.316          | 7.995             | -0.321            | 0.80        |
| <i>TMOD1</i>        | 7.800          | 7.480             | -0.320            | 0.80        |
| <i>SRXN1</i>        | 9.541          | 9.222             | -0.319            | 0.80        |
| <i>LOC100131164</i> | 7.646          | 7.328             | -0.319            | 0.80        |
| <i>LOC100133591</i> | 7.596          | 7.277             | -0.319            | 0.80        |
| <i>GPR65</i>        | 9.792          | 9.475             | -0.317            | 0.80        |
| <i>LOC284988</i>    | 9.022          | 8.705             | -0.317            | 0.80        |
| <i>IFP38</i>        | 10.239         | 9.923             | -0.316            | 0.80        |
| <i>LOC100132673</i> | 12.890         | 12.574            | -0.316            | 0.80        |
| <i>NFIX</i>         | 8.104          | 7.788             | -0.316            | 0.80        |
| <i>LOC731878</i>    | 10.520         | 10.204            | -0.315            | 0.80        |
| <i>SAR1A</i>        | 9.657          | 9.342             | -0.315            | 0.80        |
| <i>YES1</i>         | 8.076          | 7.761             | -0.314            | 0.80        |
| <i>JUN</i>          | 11.446         | 11.131            | -0.314            | 0.80        |
| <i>LOC100132394</i> | 9.575          | 9.261             | -0.314            | 0.80        |
| <i>UPLP</i>         | 10.156         | 9.842             | -0.314            | 0.81        |
| <i>LOC644423</i>    | 8.137          | 7.823             | -0.314            | 0.81        |
| <i>SLC22A4</i>      | 8.151          | 7.838             | -0.313            | 0.81        |
| <i>SAP30</i>        | 8.592          | 8.280             | -0.312            | 0.81        |
| <i>LOC341315</i>    | 11.265         | 10.952            | -0.312            | 0.81        |
| <i>BCL3</i>         | 10.782         | 10.471            | -0.311            | 0.81        |
| <i>IFNG</i>         | 7.852          | 7.542             | -0.310            | 0.81        |
| <i>KIR2DL1</i>      | 8.826          | 8.517             | -0.309            | 0.81        |
| <i>LOC645691</i>    | 9.764          | 9.456             | -0.308            | 0.81        |

| <b>Gene Symbol</b> | <b>Mean SS</b> | <b>Mean CBT-I</b> | <b>Difference</b> | <b>Fold</b> |
|--------------------|----------------|-------------------|-------------------|-------------|
| <i>SELK</i>        | 9.728          | 9.420             | -0.308            | 0.81        |
| <i>MIR1275</i>     | 7.701          | 7.394             | -0.308            | 0.81        |
| <i>ITPRIP</i>      | 10.721         | 10.414            | -0.308            | 0.81        |
| <i>TNF</i>         | 8.938          | 8.631             | -0.307            | 0.81        |
| <i>DDIT4</i>       | 12.087         | 11.781            | -0.307            | 0.81        |
| <i>ERRFI1</i>      | 7.624          | 7.318             | -0.307            | 0.81        |
| <i>GNAI3</i>       | 9.122          | 8.816             | -0.306            | 0.81        |
| <i>TUBB2A</i>      | 8.044          | 7.739             | -0.305            | 0.81        |
| <i>LOC645381</i>   | 8.874          | 8.570             | -0.304            | 0.81        |
| <i>PTGER4</i>      | 11.597         | 11.293            | -0.304            | 0.81        |
| <i>FEM1C</i>       | 10.339         | 10.035            | -0.304            | 0.81        |
| <i>LOC653171</i>   | 10.204         | 9.900             | -0.304            | 0.81        |
| <i>TMEM188</i>     | 9.720          | 9.417             | -0.303            | 0.81        |
| <i>LOC644191</i>   | 11.364         | 11.062            | -0.302            | 0.81        |
| <i>GADD45A</i>     | 9.252          | 8.949             | -0.302            | 0.81        |
| <i>LOC727821</i>   | 10.265         | 9.963             | -0.302            | 0.81        |
| <i>HMGB1L1</i>     | 9.300          | 8.998             | -0.302            | 0.81        |
| <i>EIF1AX</i>      | 8.349          | 8.047             | -0.302            | 0.81        |
| <i>SEPT7</i>       | 8.722          | 8.420             | -0.301            | 0.81        |
| <i>BTG3</i>        | 9.083          | 8.782             | -0.301            | 0.81        |
| <i>PDZD8</i>       | 8.443          | 8.142             | -0.301            | 0.81        |
| <i>LOC728142</i>   | 8.224          | 7.924             | -0.301            | 0.81        |
| <i>HLX</i>         | 8.932          | 8.632             | -0.300            | 0.81        |
| <i>C14orf11</i>    | 7.304          | 7.003             | -0.300            | 0.81        |
| <i>TFRC</i>        | 10.874         | 10.574            | -0.300            | 0.81        |
| <i>B3GNT5</i>      | 7.223          | 6.925             | -0.299            | 0.81        |
| <i>ZNF683</i>      | 9.405          | 9.107             | -0.298            | 0.81        |
| <i>RAP1BL</i>      | 9.742          | 9.444             | -0.298            | 0.81        |
| <i>USMG5</i>       | 8.096          | 7.798             | -0.297            | 0.81        |
| <i>LOC151579</i>   | 10.594         | 10.297            | -0.297            | 0.81        |
| <i>FAM162A</i>     | 7.906          | 7.610             | -0.297            | 0.81        |
| <i>DUSP5</i>       | 10.727         | 10.430            | -0.297            | 0.81        |
| <i>KIR2DS5</i>     | 8.792          | 8.496             | -0.296            | 0.81        |
| <i>LOC729255</i>   | 9.206          | 8.910             | -0.296            | 0.81        |

| <b>Gene Symbol</b>  | <b>Mean SS</b> | <b>Mean CBT-I</b> | <b>Difference</b> | <b>Fold</b> |
|---------------------|----------------|-------------------|-------------------|-------------|
| <i>TOP1P2</i>       | 7.725          | 7.428             | -0.296            | 0.81        |
| <i>JUNB</i>         | 11.995         | 11.699            | -0.296            | 0.82        |
| <i>LOC100132658</i> | 9.460          | 9.164             | -0.296            | 0.82        |
| <i>CEBPD</i>        | 12.898         | 12.602            | -0.296            | 0.82        |
| <i>BCL2A1</i>       | 7.750          | 7.455             | -0.295            | 0.82        |
| <i>FAM49B</i>       | 9.535          | 9.240             | -0.295            | 0.82        |
| <i>C15orf48</i>     | 7.737          | 7.442             | -0.295            | 0.82        |
| <i>SFRS11</i>       | 8.104          | 7.810             | -0.294            | 0.82        |
| <i>LOC728098</i>    | 9.451          | 9.157             | -0.294            | 0.82        |
| <i>GYPB</i>         | 7.307          | 7.014             | -0.293            | 0.82        |
| <i>S100A12</i>      | 11.216         | 10.924            | -0.292            | 0.82        |
| <i>SMNDC1</i>       | 9.358          | 9.068             | -0.291            | 0.82        |
| <i>LOC100129742</i> | 12.945         | 12.654            | -0.291            | 0.82        |
| <i>VTI1B</i>        | 9.462          | 9.172             | -0.290            | 0.82        |
| <i>ZNF281</i>       | 9.794          | 9.504             | -0.290            | 0.82        |
| <i>POLR2J2</i>      | 9.077          | 8.789             | -0.289            | 0.82        |
| <i>AHSP</i>         | 9.094          | 8.806             | -0.289            | 0.82        |
| <i>OLR1</i>         | 7.717          | 7.429             | -0.288            | 0.82        |
| <i>CKS2</i>         | 8.664          | 8.376             | -0.288            | 0.82        |
| <i>C13orf15</i>     | 11.977         | 11.689            | -0.288            | 0.82        |
| <i>CISD2</i>        | 8.703          | 8.415             | -0.288            | 0.82        |
| <i>LCOR</i>         | 9.303          | 9.015             | -0.288            | 0.82        |
| <i>FRG1</i>         | 10.358         | 10.071            | -0.287            | 0.82        |
| <i>APOBEC3A</i>     | 7.820          | 7.535             | -0.285            | 0.82        |
| <i>NBPF8</i>        | 9.644          | 9.358             | -0.285            | 0.82        |
| <i>WDR26</i>        | 9.746          | 9.461             | -0.285            | 0.82        |
| <i>WSB2</i>         | 8.676          | 8.391             | -0.285            | 0.82        |
| <i>ATP1B1</i>       | 8.439          | 8.154             | -0.285            | 0.82        |
| <i>GAB2</i>         | 8.911          | 8.627             | -0.284            | 0.82        |
| <i>NT5C3L</i>       | 8.384          | 8.101             | -0.284            | 0.82        |
| <i>LOC650128</i>    | 8.382          | 8.101             | -0.282            | 0.82        |
| <i>RIOK3</i>        | 10.768         | 10.487            | -0.281            | 0.82        |
| <i>RPS26P11</i>     | 12.795         | 12.514            | -0.281            | 0.82        |
| <i>IRAK3</i>        | 9.962          | 9.682             | -0.281            | 0.82        |

| <b>Gene Symbol</b>  | <b>Mean SS</b> | <b>Mean CBT-I</b> | <b>Difference</b> | <b>Fold</b> |
|---------------------|----------------|-------------------|-------------------|-------------|
| <i>RGS2</i>         | 13.302         | 13.022            | -0.281            | 0.82        |
| <i>JMY</i>          | 8.178          | 7.898             | -0.280            | 0.82        |
| <i>STK17B</i>       | 10.779         | 10.500            | -0.279            | 0.82        |
| <i>LOC400061</i>    | 8.359          | 8.080             | -0.279            | 0.82        |
| <i>LOC729208</i>    | 11.818         | 11.540            | -0.278            | 0.83        |
| <i>ADM</i>          | 10.486         | 10.208            | -0.278            | 0.83        |
| <i>LOC100132715</i> | 10.794         | 10.516            | -0.278            | 0.83        |
| <i>MGAT4A</i>       | 9.850          | 9.571             | -0.278            | 0.83        |
| <i>LOC392285</i>    | 10.178         | 9.901             | -0.278            | 0.83        |
| <i>ANXA2P1</i>      | 10.009         | 9.732             | -0.278            | 0.83        |
| <i>TMEM176B</i>     | 8.228          | 7.950             | -0.278            | 0.83        |
| <i>PHACTR1</i>      | 7.945          | 7.668             | -0.277            | 0.83        |
| <i>LOC651202</i>    | 12.440         | 12.163            | -0.277            | 0.83        |
| <i>ALAS2</i>        | 8.912          | 8.636             | -0.276            | 0.83        |
| <i>RIPK5</i>        | 8.598          | 8.323             | -0.276            | 0.83        |
| <i>CES1</i>         | 8.688          | 8.413             | -0.275            | 0.83        |
| <i>KLHL24</i>       | 9.410          | 9.135             | -0.274            | 0.83        |
| <i>NXT1</i>         | 10.783         | 10.509            | -0.274            | 0.83        |
| <i>ZEB2</i>         | 9.832          | 9.558             | -0.274            | 0.83        |
| <i>TREM1</i>        | 9.032          | 8.759             | -0.273            | 0.83        |
| <i>LOC727984</i>    | 10.480         | 10.207            | -0.273            | 0.83        |
| <i>IMPA1</i>        | 8.743          | 8.471             | -0.272            | 0.83        |
| <i>CTSL1</i>        | 9.798          | 9.526             | -0.272            | 0.83        |
| <i>LOC389599</i>    | 8.980          | 8.709             | -0.272            | 0.83        |
| <i>AGFG1</i>        | 8.370          | 8.098             | -0.272            | 0.83        |
| <i>LOC650898</i>    | 7.749          | 7.478             | -0.271            | 0.83        |
| <i>IL6</i>          | 7.772          | 7.501             | -0.271            | 0.83        |
| <i>LOC338758</i>    | 12.398         | 12.128            | -0.270            | 0.83        |
| <i>LOC389787</i>    | 13.215         | 12.945            | -0.270            | 0.83        |
| <i>S1PR3</i>        | 7.953          | 7.683             | -0.270            | 0.83        |
| <i>METRNL</i>       | 9.533          | 9.264             | -0.270            | 0.83        |
| <i>NACAP1</i>       | 9.799          | 9.530             | -0.270            | 0.83        |
| <i>BCL6</i>         | 10.327         | 10.057            | -0.270            | 0.83        |
| <i>CDKN1A</i>       | 11.438         | 11.168            | -0.269            | 0.83        |

| <b>Gene Symbol</b>  | <b>Mean SS</b> | <b>Mean CBT-I</b> | <b>Difference</b> | <b>Fold</b> |
|---------------------|----------------|-------------------|-------------------|-------------|
| <i>NMD3</i>         | 9.454          | 9.185             | -0.269            | 0.83        |
| <i>RBM39</i>        | 9.427          | 9.158             | -0.269            | 0.83        |
| <i>EPB42</i>        | 7.559          | 7.291             | -0.268            | 0.83        |
| <i>LOC728643</i>    | 11.523         | 11.255            | -0.268            | 0.83        |
| <i>PPIF</i>         | 7.873          | 7.605             | -0.268            | 0.83        |
| <i>C6orf160</i>     | 12.153         | 11.885            | -0.268            | 0.83        |
| <i>SIAH2</i>        | 9.324          | 9.056             | -0.268            | 0.83        |
| <i>TLE3</i>         | 7.809          | 7.542             | -0.268            | 0.83        |
| <i>SELENBP1</i>     | 7.791          | 7.523             | -0.267            | 0.83        |
| <i>C9orf21</i>      | 9.346          | 9.079             | -0.267            | 0.83        |
| <i>IKZF5</i>        | 8.359          | 8.092             | -0.267            | 0.83        |
| <i>ABCA1</i>        | 8.704          | 8.437             | -0.267            | 0.83        |
| <i>IER3IP1</i>      | 8.648          | 8.382             | -0.267            | 0.83        |
| <i>LOC286512</i>    | 11.009         | 10.743            | -0.266            | 0.83        |
| <i>PIM3</i>         | 8.924          | 8.658             | -0.266            | 0.83        |
| <i>ETNK1</i>        | 8.232          | 7.966             | -0.266            | 0.83        |
| <i>SUMO1P3</i>      | 9.105          | 8.839             | -0.266            | 0.83        |
| <i>ZBTB2</i>        | 8.004          | 7.739             | -0.266            | 0.83        |
| <i>PNPLA8</i>       | 8.275          | 8.010             | -0.265            | 0.83        |
| <i>LOC128192</i>    | 10.068         | 9.804             | -0.265            | 0.83        |
| <i>RNF10</i>        | 9.702          | 9.437             | -0.265            | 0.83        |
| <i>BIRC2</i>        | 9.645          | 9.380             | -0.264            | 0.83        |
| <i>C1orf55</i>      | 9.976          | 9.712             | -0.264            | 0.83        |
| <i>ENC1</i>         | 8.989          | 8.725             | -0.264            | 0.83        |
| <i>LOC197135</i>    | 8.652          | 8.388             | -0.264            | 0.83        |
| <i>FLJ20273</i>     | 8.077          | 7.814             | -0.264            | 0.83        |
| <i>LOC641848</i>    | 10.774         | 10.511            | -0.263            | 0.83        |
| <i>FAM26F</i>       | 8.951          | 8.688             | -0.263            | 0.83        |
| <i>LOC100129028</i> | 13.117         | 12.854            | -0.263            | 0.83        |
| <i>KLF4</i>         | 10.219         | 9.957             | -0.263            | 0.83        |
| <i>KLHL2</i>        | 8.227          | 7.964             | -0.263            | 0.83        |
| <i>RSRC2</i>        | 9.892          | 9.630             | -0.262            | 0.83        |

**Table S2. Genes differentially expressed in TCC vs SS Control**

| Gene Symbol          | Mean SS | Mean TCC | Difference | Fold |
|----------------------|---------|----------|------------|------|
| <i>Up-regulated</i>  |         |          |            |      |
| <i>LOC653600</i>     | 8.258   | 9.023    | 0.766      | 1.70 |
| <i>DEFA1B</i>        | 9.670   | 10.410   | 0.739      | 1.67 |
| <i>KRT72</i>         | 8.066   | 8.749    | 0.684      | 1.61 |
| <i>RPS4Y1</i>        | 8.486   | 9.160    | 0.674      | 1.60 |
| <i>DEFA3</i>         | 9.875   | 10.542   | 0.666      | 1.59 |
| <i>HLA-DRB1</i>      | 9.240   | 9.879    | 0.640      | 1.56 |
| <i>HLA-DRB5</i>      | 8.098   | 8.718    | 0.620      | 1.54 |
| <i>SNHG8</i>         | 8.537   | 9.157    | 0.620      | 1.54 |
| <i>LOC100133662</i>  | 7.930   | 8.527    | 0.597      | 1.51 |
| <i>DEFA1</i>         | 10.671  | 11.240   | 0.569      | 1.48 |
| <i>CD24</i>          | 7.833   | 8.365    | 0.532      | 1.45 |
| <i>CAMP</i>          | 7.881   | 8.358    | 0.478      | 1.39 |
| <i>DEFA4</i>         | 7.497   | 7.965    | 0.468      | 1.38 |
| <i>CCL2</i>          | 7.850   | 8.309    | 0.459      | 1.38 |
| <i>KRT73</i>         | 7.704   | 8.157    | 0.453      | 1.37 |
| <i>CNTNAP2</i>       | 7.680   | 8.128    | 0.448      | 1.36 |
| <i>DKFZp761P0423</i> | 8.288   | 8.727    | 0.439      | 1.36 |
| <i>MYOM2</i>         | 8.670   | 9.083    | 0.413      | 1.33 |
| <i>LTF</i>           | 7.451   | 7.863    | 0.411      | 1.33 |
| <i>ELANE</i>         | 7.955   | 8.342    | 0.388      | 1.31 |
| <i>LOC652694</i>     | 9.465   | 9.847    | 0.383      | 1.30 |
| <i>EIF1AY</i>        | 7.635   | 8.013    | 0.379      | 1.30 |
| <i>CD79B</i>         | 10.344  | 10.721   | 0.377      | 1.30 |
| <i>CEACAM8</i>       | 7.117   | 7.492    | 0.376      | 1.30 |
| <i>RPS4Y2</i>        | 7.652   | 8.015    | 0.362      | 1.29 |
| <i>LOC253039</i>     | 7.966   | 8.323    | 0.357      | 1.28 |
| <i>FCRLA</i>         | 9.569   | 9.925    | 0.356      | 1.28 |
| <i>PRAGMIN</i>       | 8.850   | 9.203    | 0.353      | 1.28 |
| <i>HLA-DOB</i>       | 8.545   | 8.877    | 0.332      | 1.26 |
| <i>LRRN3</i>         | 8.084   | 8.412    | 0.328      | 1.26 |
| <i>FAM113B</i>       | 10.889  | 11.215   | 0.326      | 1.25 |
| <i>GTSCR1</i>        | 8.145   | 8.463    | 0.318      | 1.25 |



| <b>Gene Symbol</b>           | <b>Mean SS</b> | <b>Mean TCC</b> | <b>Difference</b> | <b>Fold</b> |
|------------------------------|----------------|-----------------|-------------------|-------------|
| <i>SCGB3A1</i>               | 7.307          | 7.619           | 0.312             | 1.24        |
| <i>VSTM1</i>                 | 8.161          | 8.471           | 0.310             | 1.24        |
| <i>CYorf15A</i>              | 7.673          | 7.983           | 0.310             | 1.24        |
| <i>VPREB3</i>                | 8.308          | 8.616           | 0.309             | 1.24        |
| <i>LOC341346</i>             | 7.059          | 7.365           | 0.306             | 1.24        |
| <i>TACSTD2</i>               | 6.939          | 7.237           | 0.297             | 1.23        |
| <i>CEACAM6</i>               | 7.279          | 7.576           | 0.296             | 1.23        |
| <i>PI16</i>                  | 7.762          | 8.058           | 0.296             | 1.23        |
| <i>CTSG</i>                  | 7.628          | 7.916           | 0.288             | 1.22        |
| <i>RNASE3</i>                | 7.345          | 7.627           | 0.282             | 1.22        |
| <i>GIMAP4</i>                | 11.660         | 11.942          | 0.281             | 1.22        |
| <i>BCAS4</i>                 | 8.242          | 8.518           | 0.276             | 1.21        |
| <i>E2F5</i>                  | 8.029          | 8.302           | 0.273             | 1.21        |
| <i>TCL1A</i>                 | 8.161          | 8.433           | 0.273             | 1.21        |
| <i>JARID1D</i>               | 7.519          | 7.791           | 0.271             | 1.21        |
| <i>CD27</i>                  | 9.875          | 10.146          | 0.271             | 1.21        |
| <i>FCRL5</i>                 | 7.438          | 7.708           | 0.269             | 1.21        |
| <i>CYP3A7</i>                | 6.862          | 7.129           | 0.267             | 1.20        |
| <i>CACNA1I</i>               | 8.076          | 8.341           | 0.266             | 1.20        |
| <i>MEF2C</i>                 | 8.017          | 8.280           | 0.263             | 1.20        |
| <b><i>Down-regulated</i></b> |                |                 |                   |             |
| <i>HBEGF</i>                 | 11.022         | 10.187          | -0.835            | 0.56        |
| <i>CCL3</i>                  | 10.596         | 9.816           | -0.780            | 0.58        |
| <i>G0S2</i>                  | 10.470         | 9.699           | -0.771            | 0.59        |
| <i>CA2</i>                   | 10.428         | 9.660           | -0.768            | 0.59        |
| <i>LOC100008588</i>          | 10.230         | 9.478           | -0.752            | 0.59        |
| <i>PTGS2</i>                 | 10.942         | 10.265          | -0.677            | 0.63        |
| <i>CXCL2</i>                 | 9.167          | 8.509           | -0.659            | 0.63        |
| <i>IL1B</i>                  | 11.241         | 10.602          | -0.639            | 0.64        |
| <i>CCL3L1</i>                | 9.798          | 9.167           | -0.631            | 0.65        |
| <i>RGS1</i>                  | 11.702         | 11.076          | -0.626            | 0.65        |
| <i>CCL3L3</i>                | 11.219         | 10.596          | -0.623            | 0.65        |
| <i>HIST1H3H</i>              | 9.268          | 8.652           | -0.616            | 0.65        |
| <i>ZNF683</i>                | 9.405          | 8.795           | -0.610            | 0.66        |

| <b>Gene Symbol</b> | <b>Mean SS</b> | <b>Mean TCC</b> | <b>Difference</b> | <b>Fold</b> |
|--------------------|----------------|-----------------|-------------------|-------------|
| <i>USMG5</i>       | 8.096          | 7.508           | -0.588            | 0.67        |
| <i>RGS18</i>       | 12.002         | 11.414          | -0.588            | 0.67        |
| <i>HBG1</i>        | 10.394         | 9.830           | -0.565            | 0.68        |
| <i>NR4A2</i>       | 10.548         | 9.987           | -0.561            | 0.68        |
| <i>IL8</i>         | 13.429         | 12.889          | -0.540            | 0.69        |
| <i>MGC13057</i>    | 9.677          | 9.146           | -0.531            | 0.69        |
| <i>LOC645128</i>   | 9.104          | 8.594           | -0.510            | 0.70        |
| <i>C21orf7</i>     | 12.233         | 11.725          | -0.508            | 0.70        |
| <i>GNG11</i>       | 11.998         | 11.498          | -0.500            | 0.71        |
| <i>CCL20</i>       | 7.942          | 7.447           | -0.495            | 0.71        |
| <i>CA1</i>         | 8.394          | 7.908           | -0.486            | 0.71        |
| <i>JUNB</i>        | 11.995         | 11.515          | -0.480            | 0.72        |
| <i>ACRBP</i>       | 9.998          | 9.521           | -0.477            | 0.72        |
| <i>PLAUR</i>       | 10.178         | 9.707           | -0.471            | 0.72        |
| <i>HBG2</i>        | 10.548         | 10.081          | -0.467            | 0.72        |
| <i>TNFAIP3</i>     | 12.339         | 11.873          | -0.466            | 0.72        |
| <i>THBS1</i>       | 10.172         | 9.708           | -0.464            | 0.73        |
| <i>FLJ45337</i>    | 8.855          | 8.393           | -0.462            | 0.73        |
| <i>IFIT1L</i>      | 7.754          | 7.293           | -0.461            | 0.73        |
| <i>CLEC1B</i>      | 9.369          | 8.911           | -0.458            | 0.73        |
| <i>MIR302C</i>     | 8.388          | 7.935           | -0.453            | 0.73        |
| <i>LOC728835</i>   | 10.508         | 10.056          | -0.452            | 0.73        |
| <i>HIST1H3F</i>    | 9.117          | 8.680           | -0.437            | 0.74        |
| <i>DUSP2</i>       | 11.194         | 10.758          | -0.437            | 0.74        |
| <i>IFNG</i>        | 7.852          | 7.418           | -0.434            | 0.74        |
| <i>ETS2</i>        | 9.809          | 9.381           | -0.428            | 0.74        |
| <i>TRIB1</i>       | 11.674         | 11.246          | -0.428            | 0.74        |
| <i>FOS</i>         | 13.555         | 13.128          | -0.427            | 0.74        |
| <i>HBD</i>         | 9.830          | 9.404           | -0.426            | 0.74        |
| <i>NAT8B</i>       | 8.548          | 8.123           | -0.425            | 0.75        |
| <i>HOXA5</i>       | 8.297          | 7.875           | -0.423            | 0.75        |
| <i>NFIL3</i>       | 10.949         | 10.536          | -0.413            | 0.75        |
| <i>CLC</i>         | 11.244         | 10.840          | -0.404            | 0.76        |
| <i>SNCA</i>        | 10.195         | 9.792           | -0.403            | 0.76        |

| <b>Gene Symbol</b>  | <b>Mean SS</b> | <b>Mean TCC</b> | <b>Difference</b> | <b>Fold</b> |
|---------------------|----------------|-----------------|-------------------|-------------|
| <i>RNF144B</i>      | 9.316          | 8.913           | -0.403            | 0.76        |
| <i>SLC25A24</i>     | 8.684          | 8.283           | -0.400            | 0.76        |
| <i>CD8A</i>         | 11.595         | 11.203          | -0.392            | 0.76        |
| <i>FECH</i>         | 8.153          | 7.762           | -0.392            | 0.76        |
| <i>LOC441763</i>    | 8.586          | 8.195           | -0.390            | 0.76        |
| <i>MMD</i>          | 11.547         | 11.157          | -0.390            | 0.76        |
| <i>GABARAPL1</i>    | 10.780         | 10.393          | -0.387            | 0.77        |
| <i>YOD1</i>         | 8.842          | 8.456           | -0.386            | 0.77        |
| <i>GAPDHL6</i>      | 7.938          | 7.554           | -0.384            | 0.77        |
| <i>MXD1</i>         | 10.432         | 10.048          | -0.384            | 0.77        |
| <i>CCL4L2</i>       | 9.536          | 9.153           | -0.384            | 0.77        |
| <i>PFKFB3</i>       | 11.050         | 10.667          | -0.383            | 0.77        |
| <i>EPB49</i>        | 8.624          | 8.242           | -0.382            | 0.77        |
| <i>HIST1H4H</i>     | 8.166          | 7.784           | -0.382            | 0.77        |
| <i>RHOU</i>         | 10.351         | 9.969           | -0.381            | 0.77        |
| <i>PPP1R15A</i>     | 12.276         | 11.899          | -0.378            | 0.77        |
| <i>HBE1</i>         | 7.277          | 6.900           | -0.377            | 0.77        |
| <i>NAMPT</i>        | 10.307         | 9.933           | -0.374            | 0.77        |
| <i>SNORD3D</i>      | 9.898          | 9.527           | -0.371            | 0.77        |
| <i>SLC4A1</i>       | 7.936          | 7.566           | -0.370            | 0.77        |
| <i>CRISPLD2</i>     | 10.020         | 9.652           | -0.368            | 0.78        |
| <i>OSM</i>          | 11.222         | 10.855          | -0.367            | 0.78        |
| <i>HIST1H2AC</i>    | 10.268         | 9.902           | -0.367            | 0.78        |
| <i>MIR1974</i>      | 12.316         | 11.951          | -0.365            | 0.78        |
| <i>CXCL1</i>        | 8.202          | 7.839           | -0.363            | 0.78        |
| <i>RAP1GAP</i>      | 7.633          | 7.271           | -0.363            | 0.78        |
| <i>LOC100131164</i> | 7.646          | 7.284           | -0.362            | 0.78        |
| <i>EBI2</i>         | 11.894         | 11.534          | -0.360            | 0.78        |
| <i>RIPK2</i>        | 11.292         | 10.934          | -0.359            | 0.78        |
| <i>CEBPD</i>        | 12.898         | 12.539          | -0.359            | 0.78        |
| <i>PDZK1IP1</i>     | 8.380          | 8.022           | -0.358            | 0.78        |
| <i>RIOK3</i>        | 10.768         | 10.411          | -0.357            | 0.78        |
| <i>TMEM111</i>      | 11.593         | 11.239          | -0.355            | 0.78        |
| <i>SIAH2</i>        | 9.324          | 8.970           | -0.354            | 0.78        |

| <b>Gene Symbol</b>  | <b>Mean SS</b> | <b>Mean TCC</b> | <b>Difference</b> | <b>Fold</b> |
|---------------------|----------------|-----------------|-------------------|-------------|
| <i>SLC2A14</i>      | 8.442          | 8.090           | -0.352            | 0.78        |
| <i>ADIPOR1</i>      | 10.676         | 10.324          | -0.351            | 0.78        |
| <i>LOC100132394</i> | 9.575          | 9.224           | -0.351            | 0.78        |
| <i>SLC7A5</i>       | 9.757          | 9.407           | -0.351            | 0.78        |
| <i>FOSB</i>         | 11.394         | 11.048          | -0.346            | 0.79        |
| <i>RNU4ATAC</i>     | 8.918          | 8.575           | -0.344            | 0.79        |
| <i>LOC728069</i>    | 11.123         | 10.783          | -0.340            | 0.79        |
| <i>GMPR</i>         | 8.464          | 8.125           | -0.339            | 0.79        |
| <i>OLFM1</i>        | 7.703          | 7.365           | -0.338            | 0.79        |
| <i>WDR40A</i>       | 9.914          | 9.580           | -0.334            | 0.79        |
| <i>AVPI1</i>        | 9.842          | 9.512           | -0.330            | 0.80        |
| <i>NRGN</i>         | 12.158         | 11.829          | -0.329            | 0.80        |
| <i>HIST2H2BE</i>    | 10.363         | 10.035          | -0.328            | 0.80        |
| <i>LOC100134364</i> | 9.283          | 8.955           | -0.327            | 0.80        |
| <i>SNIP1</i>        | 9.874          | 9.547           | -0.327            | 0.80        |
| <i>GYPB</i>         | 7.307          | 6.981           | -0.326            | 0.80        |
| <i>RAB20</i>        | 8.524          | 8.199           | -0.325            | 0.80        |
| <i>RILPL2</i>       | 10.925         | 10.603          | -0.322            | 0.80        |
| <i>ISCA1L</i>       | 8.742          | 8.421           | -0.321            | 0.80        |
| <i>XK</i>           | 7.720          | 7.399           | -0.321            | 0.80        |
| <i>BCL3</i>         | 10.782         | 10.462          | -0.319            | 0.80        |
| <i>EIF1B</i>        | 11.323         | 11.003          | -0.319            | 0.80        |
| <i>SIK1</i>         | 9.231          | 8.912           | -0.318            | 0.80        |
| <i>LOC653635</i>    | 8.473          | 8.155           | -0.318            | 0.80        |
| <i>MPP1</i>         | 10.749         | 10.432          | -0.318            | 0.80        |
| <i>CCL4L1</i>       | 8.939          | 8.623           | -0.316            | 0.80        |
| <i>CHMP1B</i>       | 11.457         | 11.141          | -0.316            | 0.80        |
| <i>SLC25A37</i>     | 9.318          | 9.003           | -0.314            | 0.80        |
| <i>HLX</i>          | 8.932          | 8.619           | -0.313            | 0.81        |
| <i>MEIS1</i>        | 8.307          | 7.994           | -0.313            | 0.81        |
| <i>RHOB</i>         | 10.245         | 9.933           | -0.312            | 0.81        |
| <i>ZBTB43</i>       | 9.409          | 9.097           | -0.312            | 0.81        |
| <i>CYP4B1</i>       | 7.754          | 7.442           | -0.311            | 0.81        |
| <i>HEMGN</i>        | 7.573          | 7.263           | -0.311            | 0.81        |

| <b>Gene Symbol</b>  | <b>Mean SS</b> | <b>Mean TCC</b> | <b>Difference</b> | <b>Fold</b> |
|---------------------|----------------|-----------------|-------------------|-------------|
| <i>CD69</i>         | 11.890         | 11.580          | -0.310            | 0.81        |
| <i>DUSP5</i>        | 10.727         | 10.418          | -0.309            | 0.81        |
| <i>FBXO7</i>        | 9.566          | 9.260           | -0.306            | 0.81        |
| <i>C20orf108</i>    | 9.499          | 9.194           | -0.306            | 0.81        |
| <i>DNAJB9</i>       | 10.155         | 9.851           | -0.305            | 0.81        |
| <i>GYPC</i>         | 10.795         | 10.490          | -0.304            | 0.81        |
| <i>NT5C3</i>        | 11.046         | 10.744          | -0.303            | 0.81        |
| <i>PDK4</i>         | 8.926          | 8.624           | -0.303            | 0.81        |
| <i>PDZD8</i>        | 8.443          | 8.140           | -0.302            | 0.81        |
| <i>LOC100128731</i> | 13.276         | 12.974          | -0.301            | 0.81        |
| <i>HLA-DQB1</i>     | 9.807          | 9.506           | -0.301            | 0.81        |
| <i>LOC100133565</i> | 7.782          | 7.482           | -0.300            | 0.81        |
| <i>CCRN4L</i>       | 8.334          | 8.035           | -0.300            | 0.81        |
| <i>SELK</i>         | 9.728          | 9.431           | -0.297            | 0.81        |
| <i>SDPR</i>         | 11.461         | 11.165          | -0.296            | 0.82        |
| <i>PER1</i>         | 8.014          | 7.719           | -0.295            | 0.82        |
| <i>MKRN1</i>        | 12.420         | 12.125          | -0.295            | 0.82        |
| <i>BTG3</i>         | 9.083          | 8.789           | -0.295            | 0.82        |
| <i>LOC649143</i>    | 10.894         | 10.601          | -0.294            | 0.82        |
| <i>IL10RA</i>       | 11.284         | 10.990          | -0.293            | 0.82        |
| <i>CISD2</i>        | 8.703          | 8.410           | -0.293            | 0.82        |
| <i>SMPDL3A</i>      | 8.547          | 8.254           | -0.293            | 0.82        |
| <i>LOC100133477</i> | 11.413         | 11.120          | -0.293            | 0.82        |
| <i>ENC1</i>         | 8.989          | 8.697           | -0.292            | 0.82        |
| <i>MIR1978</i>      | 14.190         | 13.898          | -0.292            | 0.82        |
| <i>CXCL16</i>       | 10.383         | 10.092          | -0.291            | 0.82        |
| <i>LOC652864</i>    | 9.491          | 9.201           | -0.291            | 0.82        |
| <i>GNA15</i>        | 10.342         | 10.052          | -0.290            | 0.82        |
| <i>SESN3</i>        | 8.136          | 7.846           | -0.290            | 0.82        |
| <i>UBXN6</i>        | 9.674          | 9.386           | -0.288            | 0.82        |
| <i>F13A1</i>        | 10.642         | 10.354          | -0.288            | 0.82        |
| <i>ZDHHC7</i>       | 11.653         | 11.365          | -0.288            | 0.82        |
| <i>SNHG5</i>        | 13.192         | 12.905          | -0.287            | 0.82        |
| <i>TMOD1</i>        | 7.800          | 7.514           | -0.287            | 0.82        |

| <b>Gene Symbol</b>  | <b>Mean SS</b> | <b>Mean TCC</b> | <b>Difference</b> | <b>Fold</b> |
|---------------------|----------------|-----------------|-------------------|-------------|
| <i>BMP6</i>         | 8.454          | 8.170           | -0.284            | 0.82        |
| <i>GP9</i>          | 10.918         | 10.634          | -0.284            | 0.82        |
| <i>HBM</i>          | 7.977          | 7.694           | -0.283            | 0.82        |
| <i>C9orf21</i>      | 9.346          | 9.064           | -0.282            | 0.82        |
| <i>HIST1H2AE</i>    | 7.894          | 7.612           | -0.281            | 0.82        |
| <i>TMEM176A</i>     | 9.106          | 8.825           | -0.281            | 0.82        |
| <i>ISCA1</i>        | 9.391          | 9.110           | -0.281            | 0.82        |
| <i>HRASLS2</i>      | 7.583          | 7.303           | -0.280            | 0.82        |
| <i>ITPRIP</i>       | 10.721         | 10.442          | -0.280            | 0.82        |
| <i>MGC13005</i>     | 8.281          | 8.002           | -0.279            | 0.82        |
| <i>CFD</i>          | 12.611         | 12.333          | -0.279            | 0.82        |
| <i>CD55</i>         | 9.661          | 9.382           | -0.279            | 0.82        |
| <i>NFIX</i>         | 8.104          | 7.826           | -0.278            | 0.83        |
| <i>MIR1275</i>      | 7.701          | 7.424           | -0.278            | 0.83        |
| <i>CHSY1</i>        | 11.017         | 10.739          | -0.278            | 0.83        |
| <i>FOXO3</i>        | 9.983          | 9.706           | -0.277            | 0.83        |
| <i>AXUD1</i>        | 12.164         | 11.886          | -0.277            | 0.83        |
| <i>SLC2A3</i>       | 13.384         | 13.107          | -0.277            | 0.83        |
| <i>EGR2</i>         | 10.079         | 9.802           | -0.277            | 0.83        |
| <i>GLRX5</i>        | 12.163         | 11.886          | -0.276            | 0.83        |
| <i>MAP3K8</i>       | 9.947          | 9.671           | -0.276            | 0.83        |
| <i>LOC391045</i>    | 8.487          | 8.211           | -0.276            | 0.83        |
| <i>CREG1</i>        | 10.992         | 10.716          | -0.276            | 0.83        |
| <i>PHLDA1</i>       | 8.368          | 8.092           | -0.276            | 0.83        |
| <i>FAM46C</i>       | 11.589         | 11.314          | -0.276            | 0.83        |
| <i>ARL4A</i>        | 8.252          | 7.977           | -0.275            | 0.83        |
| <i>YPEL5</i>        | 11.991         | 11.716          | -0.274            | 0.83        |
| <i>ATF3</i>         | 8.082          | 7.809           | -0.274            | 0.83        |
| <i>FBXL11</i>       | 10.803         | 10.530          | -0.273            | 0.83        |
| <i>LOC100129650</i> | 11.610         | 11.337          | -0.273            | 0.83        |
| <i>TMEM140</i>      | 9.013          | 8.741           | -0.272            | 0.83        |
| <i>SNORD3C</i>      | 8.577          | 8.305           | -0.272            | 0.83        |
| <i>BCL2L1</i>       | 9.934          | 9.663           | -0.271            | 0.83        |
| <i>RPPH1</i>        | 8.357          | 8.087           | -0.270            | 0.83        |

| <b>Gene Symbol</b> | <b>Mean SS</b> | <b>Mean TCC</b> | <b>Difference</b> | <b>Fold</b> |
|--------------------|----------------|-----------------|-------------------|-------------|
| <i>IFNGR1</i>      | 11.778         | 11.508          | -0.270            | 0.83        |
| <i>LOC389293</i>   | 8.739          | 8.469           | -0.270            | 0.83        |
| <i>ASGR1</i>       | 10.950         | 10.680          | -0.270            | 0.83        |
| <i>SNHG9</i>       | 10.914         | 10.645          | -0.269            | 0.83        |
| <i>TMEM158</i>     | 9.861          | 9.593           | -0.268            | 0.83        |
| <i>DNAJB6</i>      | 10.274         | 10.007          | -0.267            | 0.83        |
| <i>C21orf81</i>    | 7.757          | 7.490           | -0.267            | 0.83        |
| <i>CEBPZ</i>       | 11.082         | 10.815          | -0.266            | 0.83        |
| <i>FPR2</i>        | 8.347          | 8.081           | -0.266            | 0.83        |
| <i>UBAP1</i>       | 10.111         | 9.845           | -0.266            | 0.83        |
| <i>NME4</i>        | 9.745          | 9.479           | -0.266            | 0.83        |
| <i>PMAIP1</i>      | 8.954          | 8.688           | -0.266            | 0.83        |
| <i>SELENBP1</i>    | 7.791          | 7.525           | -0.265            | 0.83        |
| <i>IL6</i>         | 7.772          | 7.507           | -0.265            | 0.83        |
| <i>LOC646513</i>   | 7.815          | 7.551           | -0.264            | 0.83        |
| <i>TSG101</i>      | 10.237         | 9.973           | -0.264            | 0.83        |
| <i>HRASLS3</i>     | 9.652          | 9.389           | -0.264            | 0.83        |
| <i>ZMIZ1</i>       | 10.868         | 10.605          | -0.263            | 0.83        |
| <i>NOP10</i>       | 12.290         | 12.028          | -0.263            | 0.83        |

**Supporting Information: Exploratory Gene Set Enrichment Analysis**

Results of pathway discovery analyses using Gene Set Enrichment Analysis with annotation libraries representing Gene Ontology terms, KEGG pathways, and Biocarta pathways.

| NAME                                                        | SIZE | ES          | NES        | NOM p-val   | FDR q-val  | FWER p-val |
|-------------------------------------------------------------|------|-------------|------------|-------------|------------|------------|
| <i>Up-regulated in CBT *</i>                                |      |             |            |             |            |            |
| BIOCARTA_PGC1A_PATHWAY                                      | 22   | 0.52082425  | 1.552498   | 0.012422361 | 0.5870969  | 0.608      |
| BIOCARTA_STATHMIN_PATHWAY                                   | 18   | 0.6895524   | 1.6168551  | 0.031128405 | 0.6090747  | 0.436      |
| <i>Down-regulated in CBT (Up-regulated in CBT vs. SS) *</i> |      |             |            |             |            |            |
| BIOCARTA_LONGEVITY_PATHWAY                                  | 15   | -0.81566095 | -2.0018673 | 0           | 0.00554113 | 0.005      |
| BIOCARTA_IGF1_PATHWAY                                       | 21   | -0.5847969  | -1.595097  | 0.014227643 | 0.37429705 | 0.498      |
| BIOCARTA_NTHI_PATHWAY                                       | 24   | -0.69617516 | -1.5326787 | 0.01622718  | 0.26414937 | 0.668      |
| BIOCARTA_IL1R_PATHWAY                                       | 32   | -0.70354766 | -1.5563744 | 0.018036073 | 0.33817348 | 0.612      |
| BIOCARTA_VEGF_PATHWAY                                       | 29   | -0.49327794 | -1.4889152 | 0.018181818 | 0.28670296 | 0.774      |
| BIOCARTA_ERYTH_PATHWAY                                      | 15   | -0.71767753 | -1.5979928 | 0.021956088 | 0.54675853 | 0.487      |
| BIOCARTA_LAIR_PATHWAY                                       | 17   | -0.729171   | -1.5447263 | 0.027944112 | 0.2689689  | 0.644      |
| BIOCARTA_NGF_PATHWAY                                        | 18   | -0.6003564  | -1.5810516 | 0.031311154 | 0.32484016 | 0.538      |
| BIOCARTA_ETS_PATHWAY                                        | 18   | -0.6165029  | -1.5227926 | 0.0327553   | 0.25532025 | 0.687      |
| BIOCARTA_INSULIN_PATHWAY                                    | 22   | -0.545544   | -1.5143887 | 0.034343433 | 0.2470022  | 0.708      |
| BIOCARTA_EIF_PATHWAY                                        | 16   | -0.48663598 | -1.5529187 | 0.036585364 | 0.2936218  | 0.623      |
| BIOCARTA_CYTOKINE_PATHWAY                                   | 21   | -0.6481439  | -1.4579014 | 0.040816326 | 0.29016426 | 0.838      |

\* All findings nominally significant at  $p < .05$  in GSEA analyses using Biocarta gene set annotations.

| NAME                                                        | SIZE | ES          | NES        | NOM p-val   | FDR q-val  | FWER p-val |
|-------------------------------------------------------------|------|-------------|------------|-------------|------------|------------|
| <i>Up-regulated in TCC *</i>                                |      |             |            |             |            |            |
| none                                                        |      |             |            |             |            |            |
| <i>Down-regulated in TCC (Up-regulated in TCC vs. SS) *</i> |      |             |            |             |            |            |
| BIOCARTA_IL6_PATHWAY                                        | 22   | -0.7462543  | -1.4785315 | 0.003034901 | 0.7241734  | 0.566      |
| BIOCARTA_STEM_PATHWAY                                       | 15   | -0.67289776 | -1.6998838 | 0.012345679 | 0.1567801  | 0.08       |
| BIOCARTA_P53HYPOXIA_PATHWAY                                 | 22   | -0.5548962  | -1.4673682 | 0.023255814 | 0.40840283 | 0.591      |
| BIOCARTA_ERYTH_PATHWAY                                      | 15   | -0.6958326  | -1.6558483 | 0.027253669 | 0.13455929 | 0.14       |
| BIOCARTA_NGF_PATHWAY                                        | 18   | -0.6173523  | -1.433575  | 0.027732464 | 0.42898822 | 0.665      |
| BIOCARTA_ETS_PATHWAY                                        | 18   | -0.6381832  | -1.355856  | 0.03255814  | 0.45191863 | 0.791      |
| BIOCARTA_INSULIN_PATHWAY                                    | 22   | -0.6081079  | -1.3938653 | 0.036565978 | 0.48670775 | 0.733      |
| BIOCARTA_HER2_PATHWAY                                       | 22   | -0.60167724 | -1.4745817 | 0.04217926  | 0.5669438  | 0.574      |
| BIOCARTA_BCELLSURVIVAL_PATHWAY                              | 15   | -0.59838057 | -1.4729756 | 0.04761905  | 0.46045184 | 0.576      |

\* Results represent all findings nominally significant at  $p < .05$  in GSEA analyses using Biocarta gene set annotations.



## CONSORT CHECKLIST

**Table.** CONSORT 2010 Checklist of Information to Include When Reporting a Randomized Trial<sup>a</sup>

| Section and Topic                                       | Item No. | Checklist Item                                                                                                                                                                              | Reported on Page No. |
|---------------------------------------------------------|----------|---------------------------------------------------------------------------------------------------------------------------------------------------------------------------------------------|----------------------|
| <b>Title and abstract</b>                               | 1a       | Identification as a randomized trial in the title                                                                                                                                           | 1                    |
|                                                         | 1b       | Structured summary of trial design, methods, results, and conclusions (for specific guidance see CONSORT for abstracts)                                                                     | 2                    |
| <b>Introduction</b><br>Background and objectives        | 2a       | Scientific background and explanation of rationale                                                                                                                                          | 3-4                  |
|                                                         | 2b       | Specific objectives or hypotheses                                                                                                                                                           | 4                    |
| <b>Methods</b><br>Trial design                          | 3a       | Description of trial design (such as parallel, factorial) including allocation ratio                                                                                                        | 5                    |
|                                                         | 3b       | Important changes to methods after trial commencement (such as eligibility criteria), with reasons                                                                                          | 5                    |
| Participants                                            | 4a       | Eligibility criteria for participants                                                                                                                                                       | 5                    |
|                                                         | 4b       | Settings and locations where the data were collected                                                                                                                                        | 5                    |
| Interventions                                           | 5        | The interventions for each group with sufficient details to allow replication, including how and when they were actually administered                                                       | 5                    |
| Outcomes                                                | 6a       | Completely defined prespecified primary and secondary outcome measures, including how and when they were assessed                                                                           | 6                    |
|                                                         | 6b       | Any changes to trial outcomes after the trial commenced, with reasons                                                                                                                       | 5                    |
| Sample size                                             | 7a       | How sample size was determined                                                                                                                                                              | 7                    |
|                                                         | 7b       | When applicable, explanation of any interim analyses and stopping guidelines                                                                                                                | N/A                  |
| Randomization<br>Sequence generation                    | 8a       | Method used to generate the random allocation sequence                                                                                                                                      | 5                    |
|                                                         | 8b       | Type of randomization; details of any restriction (such as blocking and block size)                                                                                                         | 5                    |
| Allocation concealment mechanism                        | 9        | Mechanism used to implement the random allocation sequence (such as sequentially numbered containers), describing any steps taken to conceal the sequence until interventions were assigned | 5                    |
| Implementation                                          | 10       | Who generated the random allocation sequence, who enrolled participants, and who assigned participants to interventions                                                                     | 5                    |
| Blinding                                                | 11a      | If done, who was blinded after assignment to interventions (for example, participants, care providers, those assessing outcomes) and how                                                    | 5                    |
|                                                         | 11b      | If relevant, description of the similarity of interventions                                                                                                                                 | 5                    |
| Statistical methods                                     | 12a      | Statistical methods used to compare groups for primary and secondary outcomes                                                                                                               | 8                    |
|                                                         | 12b      | Methods for additional analyses, such as subgroup analyses and adjusted analyses                                                                                                            | 8                    |
| <b>Results</b>                                          |          |                                                                                                                                                                                             |                      |
| Participant flow<br>(a diagram is strongly recommended) | 13a      | For each group, the numbers of participants who were randomly assigned, received intended treatment, and were analyzed for the primary outcome                                              | 9                    |
|                                                         | 13b      | For each group, losses and exclusions after randomization, together with reasons                                                                                                            | 9                    |
| Recruitment                                             | 14a      | Dates defining the periods of recruitment and follow-up                                                                                                                                     | 5                    |
|                                                         | 14b      | Why the trial ended or was stopped                                                                                                                                                          | 5                    |
| Baseline data                                           | 15       | A table showing baseline demographic and clinical characteristics for each group                                                                                                            | 25                   |
| Numbers analyzed                                        | 16       | For each group, number of participants (denominator) included in each analysis and whether the analysis was by original assigned groups                                                     | 8                    |
| Outcomes and estimation                                 | 17a      | For each primary and secondary outcome, results for each group, and the estimated effect size and its precision (such as 95% confidence interval)                                           | 10-12                |
|                                                         | 17b      | For binary outcomes, presentation of both absolute and relative effect sizes is recommended                                                                                                 | N/A                  |
| Ancillary analyses                                      | 18       | Results of any other analyses performed, including subgroup analyses and adjusted analyses, distinguishing prespecified from exploratory                                                    | 12                   |
| Harms                                                   | 19       | All important harms or unintended effects in each group (for specific guidance see CONSORT for harms)                                                                                       | 9                    |
| <b>Comment</b>                                          |          |                                                                                                                                                                                             |                      |
| Limitations                                             | 20       | Trial limitations, addressing sources of potential bias, imprecision, and, if relevant, multiplicity of analyses                                                                            | 15                   |
| Generalizability                                        | 21       | Generalizability (external validity, applicability) of the trial findings                                                                                                                   | 15                   |
| Interpretation                                          | 22       | Interpretation consistent with results, balancing benefits and harms, and considering other relevant evidence                                                                               | 13-14                |
| <b>Other information</b>                                |          |                                                                                                                                                                                             |                      |
| Registration                                            | 23       | Registration number and name of trial registry                                                                                                                                              | 2                    |
| Protocol                                                | 24       | Where the full trial protocol can be accessed, if available                                                                                                                                 | 2                    |
| Funding                                                 | 25       | Sources of funding and other support (such as supply of drugs), role of funders                                                                                                             | 17                   |

<sup>a</sup>We strongly recommend reading this statement in conjunction with the CONSORT 2010 Explanation and Elaboration for important clarifications on all the items. If relevant, we also recommend reading CONSORT extensions for cluster randomized trials, noninferiority and equivalence trials, nonpharmacological treatments, herbal interventions, and pragmatic trials. Additional extensions are forthcoming: for those and for up-to-date references relevant to this checklist, see <http://www.consort-statement.org>.

## Supplemental References

1. American Psychiatric Association (2000): *Diagnostic and Statistical Manual of Mental Disorders (DSM-IV-TR)*. 4th Ed Text Revision, Washington, DC: American Psychiatric Association.
2. American Academy of Sleep Medicine (2005): *The International Classification of Sleep Disorders: Diagnostic and Coding Manual*. 2nd Ed. A.A.o.S. Medicine, Darien, IL: American Academy of Sleep Medicine.
3. Mai E, Buysse DJ (2008): Insomnia: Prevalence, Impact, Pathogenesis, Differential Diagnosis, and Evaluation. *Sleep Med Clin*. 3(2):167-174
4. American Psychiatric Association (2013): *Diagnostic and Statistical Manual of Mental Disorders-5*. Fifth Edition, Washington, D.C.: American Psychiatric Publishing.
5. Folstein MF, Folstein SE, McHugh PR (1975): "Mini-mental state". A practical method for grading the cognitive state of patients for the clinician. *J Psychiatr Res*. 12(3):189-198.
6. Morin CM, Bootzin RR, Buysse DJ, Edinger JD, Espie CA, Lichstein KL (2006): Psychological and behavioral treatment of insomnia:update of the recent evidence (1998-2004). *Sleep* 29:1398-414.
7. Vgontzas AN, Basta M, Fernandez-Mendoza J (2014): Subjective short sleep duration: what does it mean? *Sleep Med Rev*. 18(4):291-292.
8. Vgontzas AN, Fernandez-Mendoza J, Liao D, Bixler EO (2013): Insomnia with objective short sleep duration: the most biologically severe phenotype of the disorder. *Sleep Med Rev*. 17(4):241-254.
9. Keefe FJ, Caldwell DS (1997): Cognitive behavioral control of arthritis pain. *Med Clin North Am* 81:277-90.
10. Nofzinger EA, Buysse DJ, Germain A, Price JC, Miewald JM, Kupfer DJ (2004): Functional neuroimaging evidence for hyperarousal in insomnia. *Am J Psychiatry* 161:2126-8.

11. Morin CM, Rodrigue S, Ivers H (2003): Role of stress, arousal, and coping skills in primary insomnia. *Psychosom Med* 65:259-67.
12. Bonnet MH, Arand DL (1997): Hyperarousal and insomnia. *Sleep Med Rev* 1:97-108.
13. Stone JF (1996): *Tai Chi Chih, Joy Through Movement*. Good Karma Publishing, Incorporated.
14. Nicassio P, Greenberg MA (2001): The effectiveness of cognitive-behavioral and psychoeducational interventions in the management of arthritis. I. In: Weisman MH, Weinblatt M, Louie J, eds. *Treatment of rheumatic diseases*. Orlando: William Saunders; 147-61.
